# Supplementary material for: Facet-Dependent SERS Activity of Co3O4
Source: MDPI journal article supplement (doi:10.3390/ijms232415930), 2022-12-14
Supplement: s1 [file s1]

# Supporting information for Facet dependent SERS activity of Co<sub>3</sub>O<sub>4</sub>

Yibo Feng, Jiaxing Wang, Jixiang Hou, Xu Zhang, Yuhang Gao\* and Kaiwen Wang\*

Beijing Key Laboratory and Institute of Microstructure and Property of Advanced Materials,  
Faculty of Materials and Manufacturing, Beijing University of Technology, Beijing 100124,  
China

\* Correspondence: yuhanggao163@163.com (Y.G.); 18811419320@163.com (K.W.)

## **Table of contents**

### **1. Supplementary figures**

**Figure S1.** XRD pattern of  $\text{Co}_3\text{O}_4$ .

**Figure S2.** XPS and VB-XPS spectra of  $\text{Co}_3\text{O}_4$ .

**Figure S3.** UV spectra of  $\text{Co}_3\text{O}_4$ .

**Figure S4.** Raman spectra of powders A and R6G.

**Figure S5.** Fresh and three months later Raman spectrum of  $\text{Co}_3\text{O}_4+\text{A}$ .

### **2. Supplementary original data**

**Data S1.** INCAR for DFT calculation.

**Data S2.** CONTCAR of Adenine adsorbed on C-100.

**Data S3.** CONTCAR of Adenine adsorbed on C-111.

## 1. Supplementary figures

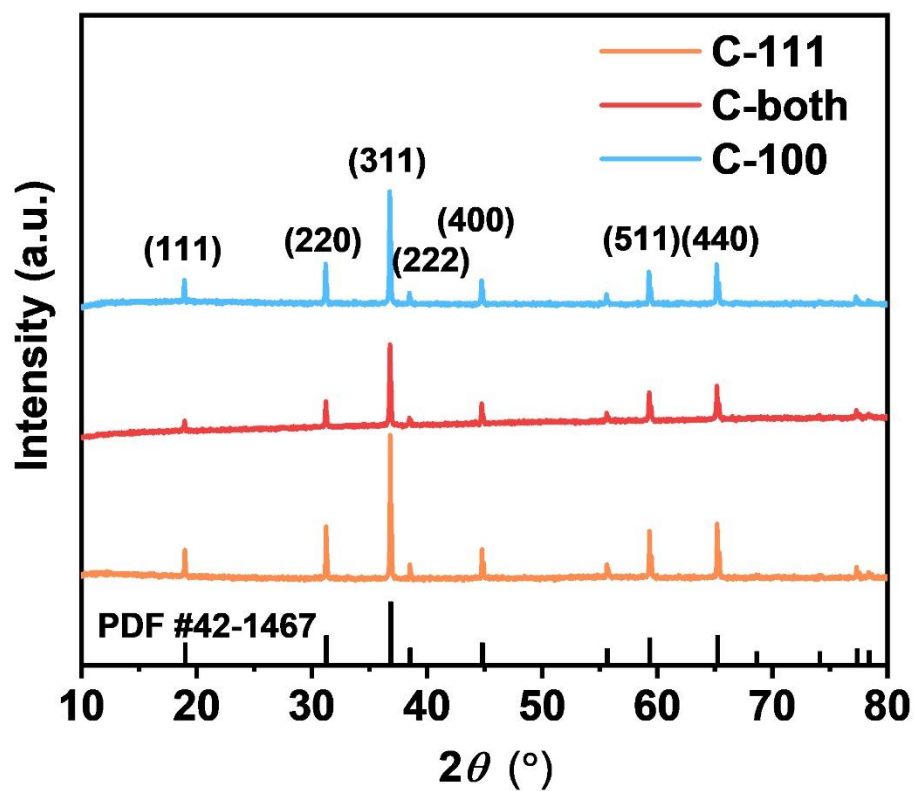

Figure S1. XRD patterns of C-100, C111 and C-both.

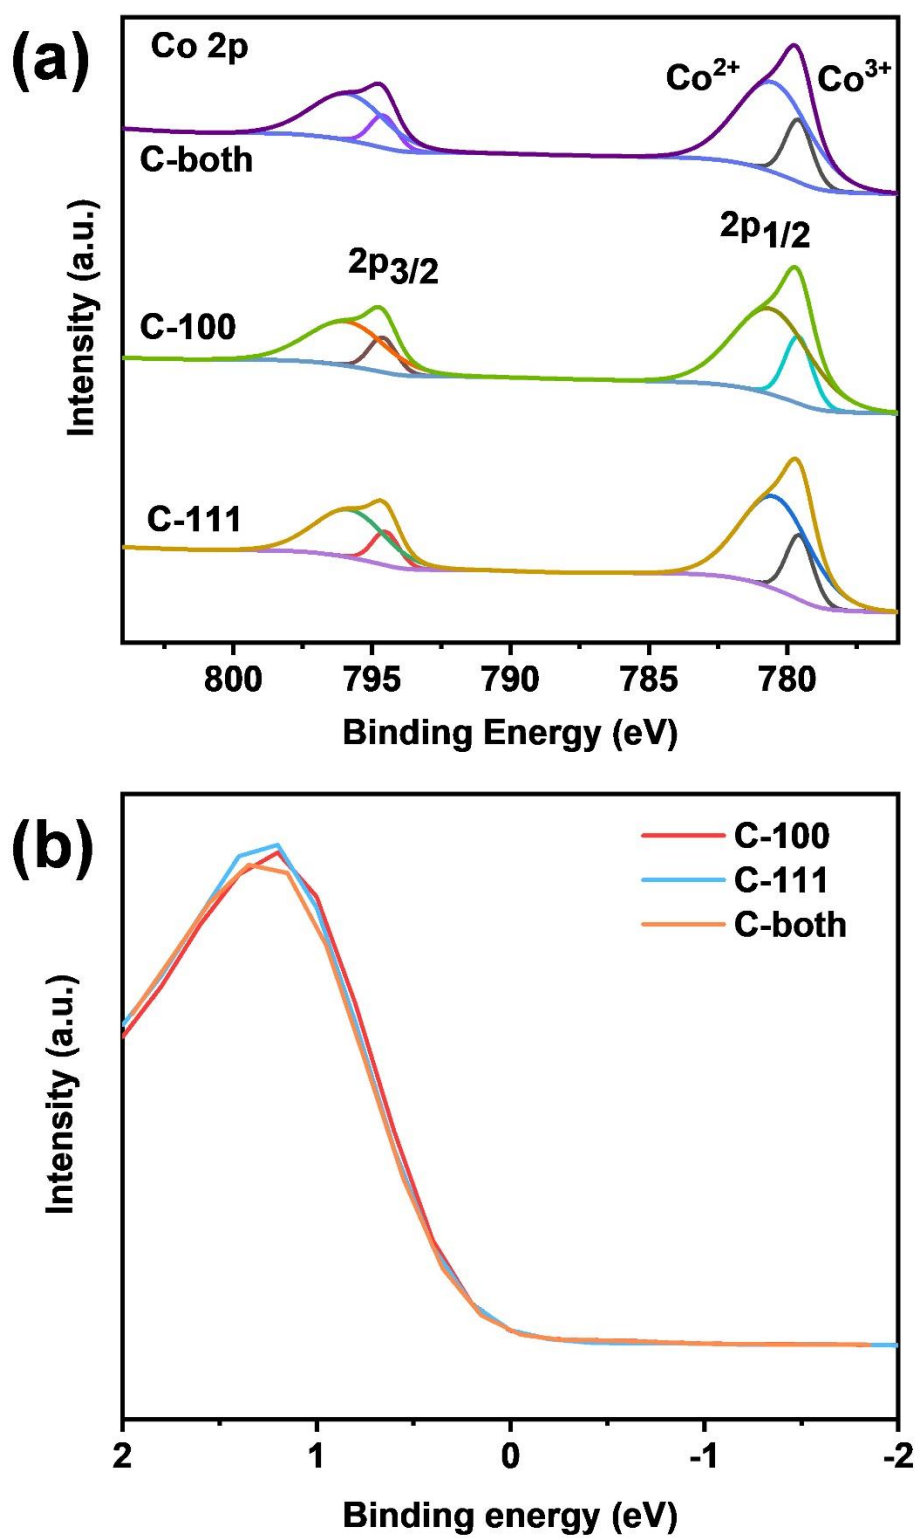

Figure S2. (a) XPS spectra of Co element. (b) VB-XPS spectra of C-100, C111 and C-both.

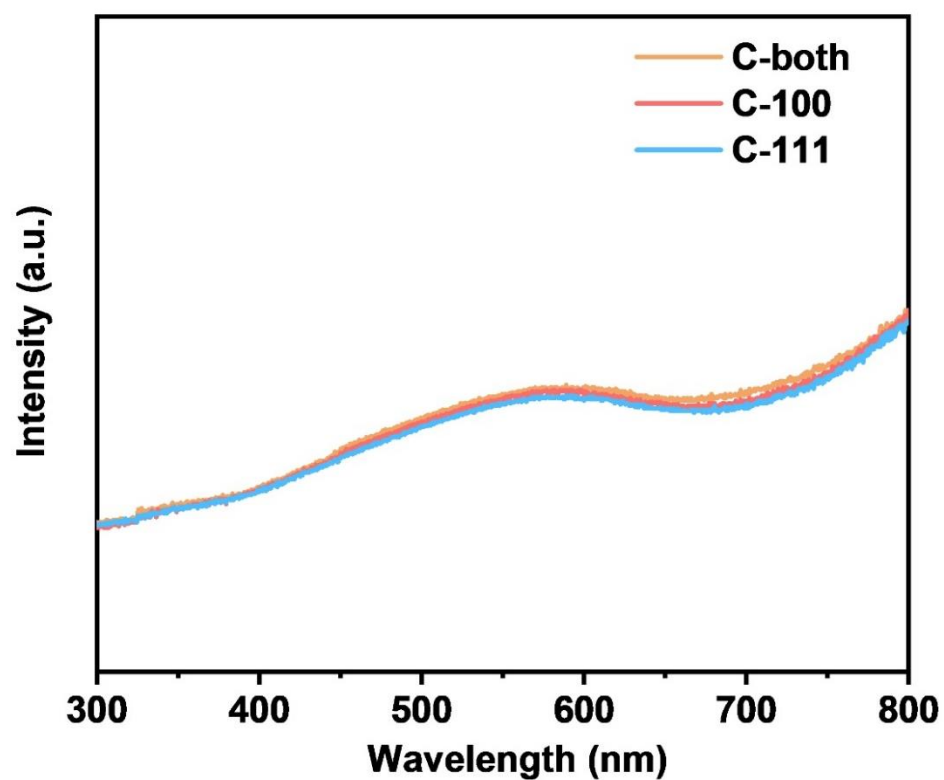

Figure S3. UV spectra of C-100, C111 and C-both.

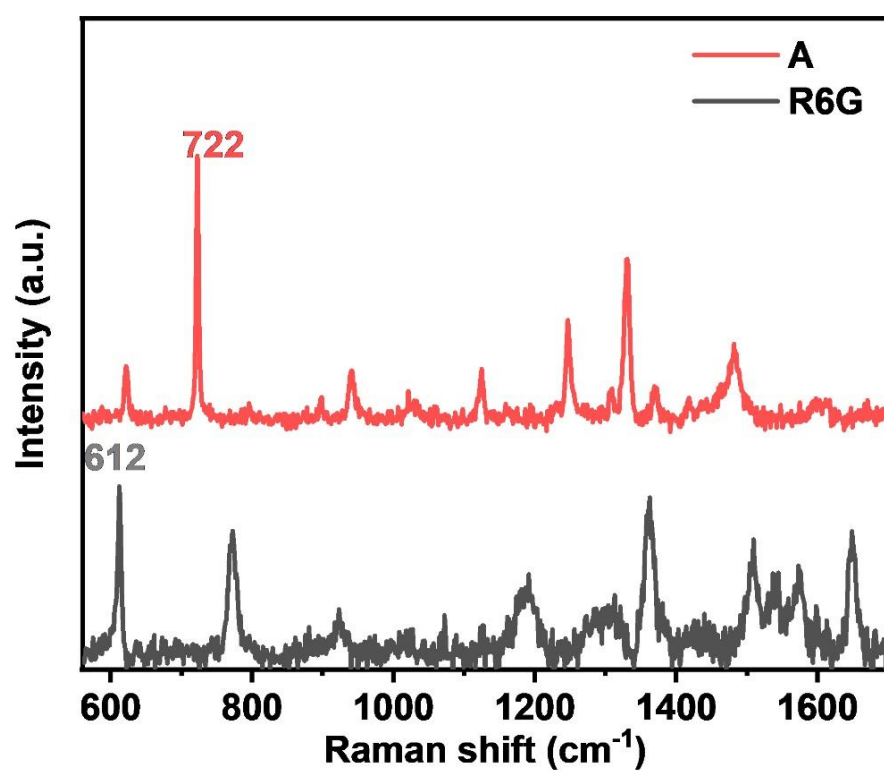

Figure S4. Raman spectra of powders A and R6G.

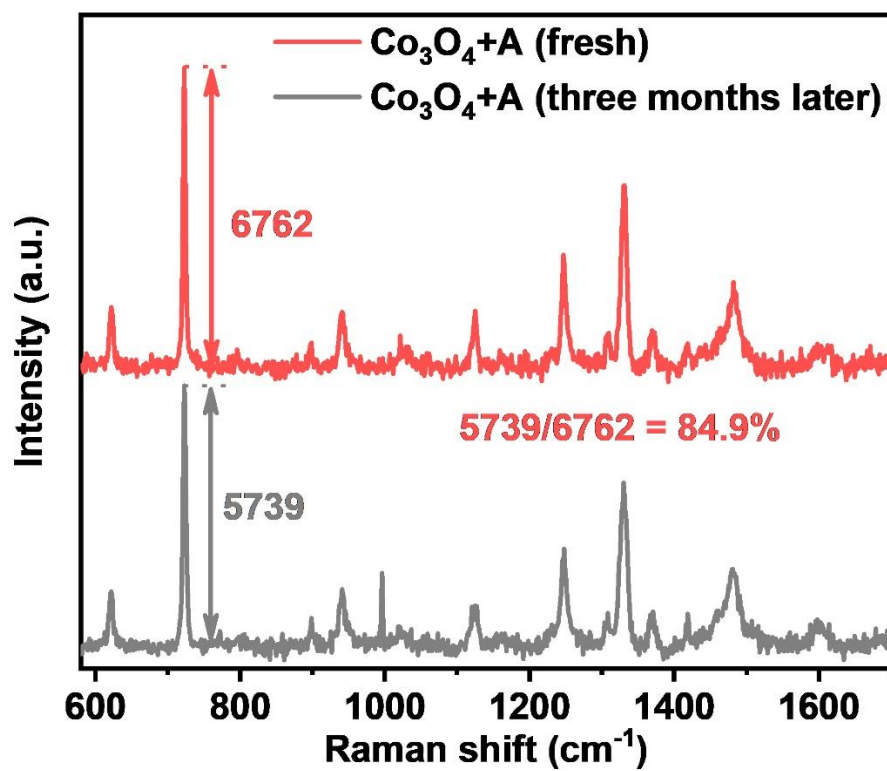

Figure S5. Fresh and three months later Raman spectrum of Co<sub>3</sub>O<sub>4</sub>+A.

## 2. Supplementary original data

INCAR

ENCUT=400

ISMEAR=0

SIGMA=0.1

EDIFF=0.1E-04

EDIFFG=-0.02

NSW=2000

IALGO=38

GGA=PE

IVDW=12

IBRION=2

ISPIN=2

LMAXMIX=4

AMIX=0.2

BMIX=0.0001 !most zero,but 0 will crash some versions

AMIX\_MAG=0.8

BMIX\_MAG=0.0001 !most zero,but 0 will crash some versions

NPAR=8

NELM=200

LCHARG=F

LWAVE=F

LREAL=Auto

ALGO = Fast

LDAU=.TRUE.

LDAUTYPE=2

LDAUL= 2 -1 -1 -1 -1

LDAUU= 5.9 0.0 0 0 0

LDAUJ= 0.0 0.0 0 0 0

LDAUPRINT=2

**Data S1.** INCAR for DFT calculation.

CONTCAR-adenine adsorbed on Co<sub>3</sub>O<sub>4</sub>-(100)

1.0000000000000000

22.5440998077000003 0.0000000000000000 0.0000000000000000

-0.0194361919000000 22.5425922527999987 0.0000000000000000

0.0000000000000000 0.0000000000000000 27.0573997497999983

Co O N C H

192 256 5 5 5

Selective dynamics

Direct

|                    |                    |                    |   |   |   |
|--------------------|--------------------|--------------------|---|---|---|
| 0.2495999870000034 | 0.0000500000000017 | 0.0088300000000032 | F | F | F |
| 0.1249200099999968 | 0.1250400039999988 | 0.1473300019999968 | F | F | F |
| 0.0651099950000003 | 0.1250200039999996 | 0.0387800020000029 | F | F | F |
| 0.1871600070000028 | 0.0000599999999977 | 0.1851199999999977 | F | F | F |
| 0.9999300579999968 | 0.1867800050000028 | 0.1111199999999997 | F | F | F |
| 0.1247771958227972 | 0.0629094520072574 | 0.2548775978296308 | T | T | T |
| 0.1249699959999973 | 0.0000599999999977 | 0.0691500020000007 | F | F | F |
| 0.9998270282754831 | 0.1250316521383751 | 0.2249073592017456 | T | T | T |
| 0.9999200769999987 | 0.0633300029999972 | 0.1111399939999984 | F | F | F |
| 0.1248134800234361 | 0.1870917637055121 | 0.2549052331644143 | T | T | T |
| 0.1847599919999965 | 0.1250600139999989 | 0.0388100010000016 | F | F | F |
| 0.0627399970000013 | 0.0000599999999977 | 0.1850499999999968 | F | F | F |
| 0.4996199959999998 | 0.0000500000000017 | 0.0088599999999985 | F | F | F |
| 0.3749400150000000 | 0.1250600139999989 | 0.1473599959999987 | F | F | F |
| 0.3151300010000000 | 0.1250099989999995 | 0.0388100010000016 | F | F | F |
| 0.4371500029999993 | 0.0000599999999977 | 0.1851299920000002 | F | F | F |
| 0.2499100029999965 | 0.1868000150000029 | 0.1111199999999997 | F | F | F |
| 0.3748528468859308 | 0.0629226716279548 | 0.2549421449259394 | T | T | T |
| 0.3749899940000034 | 0.0000599999999977 | 0.0692099999999982 | F | F | F |
| 0.2497795152097039 | 0.1250159008398106 | 0.2249262415173361 | T | T | T |
| 0.2499400020000024 | 0.0633300029999972 | 0.1111699969999975 | F | F | F |
| 0.3746712781612367 | 0.1870640519231213 | 0.2549425971581130 | T | T | T |
| 0.4347499870000036 | 0.1250600139999989 | 0.0388300030000011 | F | F | F |
| 0.3127300160000033 | 0.0000500000000017 | 0.1851199999999977 | F | F | F |
| 0.7497999730000018 | 0.0000500000000017 | 0.0088500000000025 | F | F | F |
| 0.6249500030000021 | 0.1250400039999988 | 0.1473599959999987 | F | F | F |
| 0.5651199539999965 | 0.1250099989999995 | 0.0388000000000019 | F | F | F |
| 0.6871599990000021 | 0.0000500000000017 | 0.1851199999999977 | F | F | F |
| 0.4999099819999984 | 0.1868000150000029 | 0.1111399939999984 | F | F | F |
| 0.6248195895176636 | 0.0630287252270569 | 0.2549099419837312 | T | T | T |
| 0.6249700309999966 | 0.0000399999999985 | 0.0692299979999973 | F | F | F |
| 0.4997370568178000 | 0.1249857386315532 | 0.2248861673392697 | T | T | T |
| 0.4999299759999971 | 0.0633300029999972 | 0.1111799979999972 | F | F | F |
| 0.6246576525013394 | 0.1872110145152209 | 0.2547486279833731 | T | T | T |



|                    |                    |                    |   |   |   |
|--------------------|--------------------|--------------------|---|---|---|
| 0.6847399819999964 | 0.1250600139999989 | 0.0388400000000004 | F | F | F |
| 0.5627200030000026 | 0.0000399999999985 | 0.1851199999999977 | F | F | F |
| 0.9998500290000010 | 0.0000399999999985 | 0.0088300000000032 | F | F | F |
| 0.8749399650000029 | 0.1250499989999980 | 0.1473400029999965 | F | F | F |
| 0.8151199750000018 | 0.1250099989999995 | 0.0387800020000029 | F | F | F |
| 0.9371399690000004 | 0.0000500000000017 | 0.1850499999999968 | F | F | F |
| 0.7499399109999985 | 0.1868000150000029 | 0.1111199999999997 | F | F | F |
| 0.8748244782749266 | 0.0630252321532168 | 0.2548898682922238 | T | T | T |
| 0.8748699810000033 | 0.0000100000000032 | 0.0691699999999997 | F | F | F |
| 0.7498282109392042 | 0.1250970389930748 | 0.2249176831927301 | T | T | T |
| 0.7499200049999999 | 0.0633200030000012 | 0.1111699969999975 | F | F | F |
| 0.8749667597862306 | 0.1872560118705485 | 0.2548696757927933 | T | T | T |
| 0.9347499949999971 | 0.1250200039999996 | 0.0388100010000016 | F | F | F |
| 0.8127200240000008 | 0.0000399999999985 | 0.1850999970000018 | F | F | F |
| 0.2497400080000034 | 0.2500199979999991 | 0.0087600000000023 | F | F | F |
| 0.1249400080000029 | 0.3750100279999984 | 0.1473599959999987 | F | F | F |
| 0.0651300030000002 | 0.3749900179999983 | 0.0387800020000029 | F | F | F |
| 0.1871400180000009 | 0.2500300239999973 | 0.1850800129999968 | F | F | F |
| 0.9999300019999993 | 0.4367600240000016 | 0.1111199999999997 | F | F | F |
| 0.1249359172463341 | 0.3128350756577380 | 0.2549177169265193 | T | T | T |
| 0.1249300010000027 | 0.2500100139999972 | 0.0691799969999991 | F | F | F |
| 0.0001445112848385 | 0.3750198149143750 | 0.2248862453381479 | T | T | T |
| 0.9999300039999994 | 0.3133100169999992 | 0.1111399939999984 | F | F | F |
| 0.1249410430569383 | 0.4371874591093609 | 0.2548966600908542 | T | T | T |
| 0.1847599979999970 | 0.3749900179999983 | 0.0387899979999986 | F | F | F |
| 0.0627299969999981 | 0.2500300239999973 | 0.1850699849999984 | F | F | F |
| 0.4997700210000033 | 0.2500199979999991 | 0.0088099999999969 | F | F | F |
| 0.3749500269999970 | 0.3750400229999968 | 0.1473499949999990 | F | F | F |
| 0.3151299869999988 | 0.3749900179999983 | 0.0387800020000029 | F | F | F |
| 0.4371399810000014 | 0.2500599970000010 | 0.1850999970000018 | F | F | F |
| 0.2499299810000011 | 0.4367600240000016 | 0.1111600050000021 | F | F | F |
| 0.3743065780387709 | 0.3132004684003254 | 0.2549060752904027 | T | T | T |
| 0.3749200119999969 | 0.2500400079999991 | 0.0691900019999991 | F | F | F |
| 0.2497739677831697 | 0.3751100767373761 | 0.2249218369313341 | T | T | T |
| 0.2499200079999966 | 0.3133200219999992 | 0.1111499949999981 | F | F | F |
| 0.3747768733717180 | 0.4374805970536056 | 0.2551715418648892 | T | T | T |
| 0.4347600239999991 | 0.3750200120000002 | 0.0388100010000016 | F | F | F |
| 0.3127099889999982 | 0.2500500129999992 | 0.1850900049999993 | F | F | F |
| 0.7499099799999982 | 0.2500199979999991 | 0.0088000000000008 | F | F | F |
| 0.6249600149999992 | 0.3750200120000002 | 0.1473799990000018 | F | F | F |
| 0.5651299740000013 | 0.3750000020000002 | 0.0388000000000019 | F | F | F |
| 0.6871500100000034 | 0.2500400079999991 | 0.1850800129999968 | F | F | F |
| 0.4999299690000001 | 0.4367700080000034 | 0.1111399939999984 | F | F | F |
| 0.6242445362959599 | 0.3135217714310260 | 0.2547098709765944 | T | T | T |

|                     |                    |                    |   |   |   |
|---------------------|--------------------|--------------------|---|---|---|
| 0.6249100160000012  | 0.2500500129999992 | 0.0692000029999988 | F | F | F |
| 0.4984381016127494  | 0.3753509322971748 | 0.2233306103529868 | T | T | T |
| 0.49992997900000009 | 0.3133300060000010 | 0.1111499949999981 | F | F | F |
| 0.6252890312246543  | 0.4374719449361651 | 0.2564809919507412 | T | T | T |
| 0.68475001899999991 | 0.3750200120000002 | 0.0388400000000004 | F | F | F |
| 0.5626999460000022  | 0.2500300239999973 | 0.1850900049999993 | F | F | F |
| 0.9997100360000033  | 0.2500199979999991 | 0.0087400000000031 | F | F | F |
| 0.8749700190000027  | 0.3750200120000002 | 0.1473799990000018 | F | F | F |
| 0.8151600130000034  | 0.3749800340000036 | 0.0387899979999986 | F | F | F |
| 0.9371499889999981  | 0.2500400079999991 | 0.1850699849999984 | F | F | F |
| 0.7499300229999974  | 0.4367600240000016 | 0.1111600050000021 | F | F | F |
| 0.8753288550717675  | 0.3129617415067233 | 0.2548419872035784 | T | T | T |
| 0.8749799460000034  | 0.2500300239999973 | 0.0691500020000007 | F | F | F |
| 0.7507610660741154  | 0.3752743687877101 | 0.2244586406509486 | T | T | T |
| 0.7499399240000031  | 0.3133100169999992 | 0.1111499949999981 | F | F | F |
| 0.8752927645099905  | 0.4372612342004639 | 0.2548645235175738 | T | T | T |
| 0.9347599569999971  | 0.3750400229999968 | 0.0388199969999974 | F | F | F |
| 0.8127400280000003  | 0.2500300239999973 | 0.1850699849999984 | F | F | F |
| 0.2497500200000005  | 0.5000000169999979 | 0.0088399999999993 | F | F | F |
| 0.1249500030000021  | 0.6250200420000027 | 0.1473799990000018 | F | F | F |
| 0.0651399999999995  | 0.6249900050000008 | 0.0388199969999974 | F | F | F |
| 0.1871499960000023  | 0.5000200269999979 | 0.1850999970000018 | F | F | F |
| 0.9999300570000003  | 0.6867700370000023 | 0.1111600050000021 | F | F | F |
| 0.1249653064925604  | 0.5628994878136371 | 0.2549037377600377 | T | T | T |
| 0.12496999300000006 | 0.5000000169999979 | 0.0691199979999979 | F | F | F |
| 0.0000215996731217  | 0.6250282576887382 | 0.2248602152861239 | T | T | T |
| 0.9999300500000032  | 0.5633100249999998 | 0.1111399939999984 | F | F | F |
| 0.1249438111953935  | 0.6871414650160431 | 0.2549038643422616 | T | T | T |
| 0.1847500060000016  | 0.6250500359999975 | 0.0388400000000004 | F | F | F |
| 0.0627399979999979  | 0.5000100430000032 | 0.1850499999999968 | F | F | F |
| 0.4998300190000009  | 0.5000300109999998 | 0.0088599999999985 | F | F | F |
| 0.3749600060000020  | 0.6250299840000011 | 0.1474100020000009 | F | F | F |
| 0.3151400160000009  | 0.6249900050000008 | 0.0388499969999998 | F | F | F |
| 0.4371499929999985  | 0.5000399950000016 | 0.1851100069999987 | F | F | F |
| 0.2499299850000014  | 0.6867600109999970 | 0.1111699969999975 | F | F | F |
| 0.3752284659217717  | 0.5629572734094742 | 0.2549556737312549 | T | T | T |
| 0.3749299979999989  | 0.4999899900000031 | 0.0691799969999991 | F | F | F |
| 0.2500542466241835  | 0.6250113940425500 | 0.2250429223770978 | T | T | T |
| 0.2499299990000026  | 0.5633000409999980 | 0.1111799979999972 | F | F | F |
| 0.3749948922867706  | 0.6871838541797253 | 0.2549248160771577 | T | T | T |
| 0.4347300009999984  | 0.6250299840000011 | 0.0388799999999989 | F | F | F |
| 0.3127099749999971  | 0.5000300109999998 | 0.1851100069999987 | F | F | F |
| 0.7498600150000030  | 0.5000100430000032 | 0.0088599999999985 | F | F | F |
| 0.6249900190000020  | 0.6250299840000011 | 0.1474200030000006 | F | F | F |

|                    |                    |                    |   |   |   |
|--------------------|--------------------|--------------------|---|---|---|
| 0.5651500290000016 | 0.6250000309999990 | 0.0388499969999998 | F | F | F |
| 0.6871700140000030 | 0.5000300109999998 | 0.1851100069999987 | F | F | F |
| 0.4999400060000028 | 0.6867799790000007 | 0.1111699969999975 | F | F | F |
| 0.6252800185045307 | 0.5631102686079089 | 0.2547415054571543 | T | T | T |
| 0.6249499700000030 | 0.5000200269999979 | 0.0691900019999991 | F | F | F |
| 0.5001479277461418 | 0.6250553053490842 | 0.2250198610747074 | T | T | T |
| 0.4999400000000023 | 0.5633200090000017 | 0.1111699969999975 | F | F | F |
| 0.6250573945005699 | 0.6873709177171827 | 0.2548461815041491 | T | T | T |
| 0.6847399809999999 | 0.6250500359999975 | 0.0388499969999998 | F | F | F |
| 0.5627099749999971 | 0.5000300109999998 | 0.1851100069999987 | F | F | F |
| 0.9999600060000020 | 0.5000200269999979 | 0.0088200000000001 | F | F | F |
| 0.8749500220000002 | 0.6250299840000011 | 0.1474000099999984 | F | F | F |
| 0.8151400329999987 | 0.6250100150000009 | 0.0388000000000019 | F | F | F |
| 0.9371500259999976 | 0.5000300109999998 | 0.1850599930000030 | F | F | F |
| 0.7499600279999967 | 0.6867700370000023 | 0.1111300009999994 | F | F | F |
| 0.8751677305213543 | 0.5630033061311979 | 0.2549347091447591 | T | T | T |
| 0.8748900479999975 | 0.5000200269999979 | 0.0691400010000010 | F | F | F |
| 0.7501513237936976 | 0.6250919566828335 | 0.2249490553297190 | T | T | T |
| 0.7499300710000014 | 0.5633100249999998 | 0.1111600050000021 | F | F | F |
| 0.8750745745250066 | 0.6872930622870471 | 0.2549096064379129 | T | T | T |
| 0.9347699599999970 | 0.6250100150000009 | 0.0388499969999998 | F | F | F |
| 0.8127400819999977 | 0.5000399950000016 | 0.1850999970000018 | F | F | F |
| 0.2497799949999973 | 0.7500500089999989 | 0.0088200000000001 | F | F | F |
| 0.1249499939999978 | 0.8750300129999999 | 0.1473899909999972 | F | F | F |
| 0.0651300030000002 | 0.8750500660000000 | 0.0388100010000016 | F | F | F |
| 0.1871400039999997 | 0.7500300410000023 | 0.1851199999999977 | F | F | F |
| 0.9999300349999984 | 0.9367900350000014 | 0.1111300009999994 | F | F | F |
| 0.1248742953029348 | 0.8128796751249286 | 0.2549311915432785 | T | T | T |
| 0.1249500010000020 | 0.7500400249999970 | 0.0692200009999979 | F | F | F |
| 0.9999607983730010 | 0.8750923349273710 | 0.2248927661887730 | T | T | T |
| 0.9999399949999983 | 0.8133100120000023 | 0.1111699969999975 | F | F | F |
| 0.1248808562551070 | 0.9371535058563784 | 0.2548946323024022 | T | T | T |
| 0.1847500009999976 | 0.8750399970000018 | 0.0388499969999998 | F | F | F |
| 0.0627199990000022 | 0.7500300410000023 | 0.1851100069999987 | F | F | F |
| 0.4997900119999983 | 0.7500400249999970 | 0.0088200000000001 | F | F | F |
| 0.3749499919999977 | 0.8750399970000018 | 0.1474100020000009 | F | F | F |
| 0.3151400240000015 | 0.8750200289999981 | 0.0388400000000004 | F | F | F |
| 0.4371700049999987 | 0.7500400249999970 | 0.1851199999999977 | F | F | F |
| 0.2499399969999985 | 0.9367900350000014 | 0.1111799979999972 | F | F | F |
| 0.3748376282239505 | 0.8129101883100081 | 0.2549440678282949 | T | T | T |
| 0.3749300019999993 | 0.7500400249999970 | 0.0692299979999973 | F | F | F |
| 0.2498517376521233 | 0.8750200748995056 | 0.2249298564424199 | T | T | T |
| 0.2499200070000001 | 0.8133100120000023 | 0.1111699969999975 | F | F | F |
| 0.3748513931587429 | 0.9371390211448662 | 0.2548832868775534 | T | T | T |

|                    |                    |                    |   |   |   |
|--------------------|--------------------|--------------------|---|---|---|
| 0.4347499799999994 | 0.8750399970000018 | 0.0388699989999992 | F | F | F |
| 0.3127099789999974 | 0.7500300410000023 | 0.1851199999999977 | F | F | F |
| 0.7497699560000015 | 0.7500100720000020 | 0.0087900010000013 | F | F | F |
| 0.6249600049999984 | 0.8750500660000000 | 0.1473799990000018 | F | F | F |
| 0.5651500499999997 | 0.8750200289999981 | 0.0388300030000011 | F | F | F |
| 0.6871799589999981 | 0.7500300410000023 | 0.1850800129999968 | F | F | F |
| 0.4999299759999971 | 0.9367700669999977 | 0.1111999999999966 | F | F | F |
| 0.6249662332873728 | 0.8131201687883485 | 0.2548624229778436 | T | T | T |
| 0.6249399650000029 | 0.7500400249999970 | 0.0692000029999988 | F | F | F |
| 0.4998854766809280 | 0.8750688913294833 | 0.2249686544255835 | T | T | T |
| 0.4999299690000001 | 0.8133100120000023 | 0.1111799979999972 | F | F | F |
| 0.6250184529947352 | 0.9373272033762622 | 0.2548596610832116 | T | T | T |
| 0.6847699679999977 | 0.8750399970000018 | 0.0388400000000004 | F | F | F |
| 0.5627299880000010 | 0.7500300410000023 | 0.1851199999999977 | F | F | F |
| 0.9995999890000036 | 0.7500400249999970 | 0.0087800000000016 | F | F | F |
| 0.8749599670000023 | 0.8750300129999999 | 0.1473599959999987 | F | F | F |
| 0.8151400619999976 | 0.8749899920000033 | 0.0388000000000019 | F | F | F |
| 0.9371799460000005 | 0.7500400249999970 | 0.1851199999999977 | F | F | F |
| 0.7499300300000016 | 0.9367599979999994 | 0.1111699969999975 | F | F | F |
| 0.8750200707815529 | 0.8130689983376596 | 0.2548729720792194 | T | T | T |
| 0.8750299370000008 | 0.7500100720000020 | 0.0691699999999997 | F | F | F |
| 0.7500047858642893 | 0.8750589679256612 | 0.2248794524230906 | T | T | T |
| 0.7499499910000011 | 0.8133000280000005 | 0.1111300009999994 | F | F | F |
| 0.8749721329638045 | 0.9373147655580830 | 0.2548360563963861 | T | T | T |
| 0.9347599720000019 | 0.8750500660000000 | 0.0388300030000011 | F | F | F |
| 0.8127499340000028 | 0.7500300410000023 | 0.1850800129999968 | F | F | F |
| 0.1249200060000035 | 0.0695400030000002 | 0.0372800009999992 | F | F | F |
| 0.2499200000000030 | 0.1920900140000015 | 0.1822600059999999 | F | F | F |
| 0.2499200060000035 | 0.0697000070000016 | 0.0370599979999966 | F | F | F |
| 0.1248999990000002 | 0.1923700130000014 | 0.1845499960000012 | F | F | F |
| 0.0576499989999988 | 0.2500800079999976 | 0.1126000029999972 | F | F | F |
| 0.1795593732262035 | 0.1250193178756428 | 0.2554824825658902 | T | T | T |
| 0.1249900050000008 | 0.1805899989999986 | 0.0372599989999998 | F | F | F |
| 0.2499899940000034 | 0.0580200039999994 | 0.1822800079999993 | F | F | F |
| 0.1922299989999985 | 0.2500100139999972 | 0.1126099949999997 | F | F | F |
| 0.0700505615214201 | 0.1249606774897741 | 0.2554107299443376 | T | T | T |
| 0.1922499980000012 | 0.1250000040000003 | 0.1096700009999978 | F | F | F |
| 0.0704006426141486 | 0.2499776253697423 | 0.2551595862264212 | T | T | T |
| 0.2499700119999986 | 0.1804000059999993 | 0.0370200019999984 | F | F | F |
| 0.1250000040000003 | 0.0577200050000002 | 0.1845499960000012 | F | F | F |
| 0.0576399990000027 | 0.1251000039999965 | 0.1096499989999984 | F | F | F |
| 0.1794157589135552 | 0.2499920098869235 | 0.2551872180455372 | T | T | T |
| 0.3748999920000031 | 0.0695099980000009 | 0.0373399989999967 | F | F | F |
| 0.4998999909999995 | 0.1920900140000015 | 0.1822600059999999 | F | F | F |

|                    |                    |                    |   |   |   |
|--------------------|--------------------|--------------------|---|---|---|
| 0.4998999760000018 | 0.0697000070000016 | 0.0370800000000031 | F | F | F |
| 0.3749000150000015 | 0.1924000079999999 | 0.1845699980000006 | F | F | F |
| 0.3076399919999986 | 0.2500900129999977 | 0.1126000029999972 | F | F | F |
| 0.4296180059484433 | 0.1251984258359385 | 0.2558764786090132 | T | T | T |
| 0.3749699879999966 | 0.1805800149999968 | 0.0372599989999998 | F | F | F |
| 0.4999800109999981 | 0.0580200039999994 | 0.1822999930000009 | F | F | F |
| 0.4422300080000028 | 0.2500199979999991 | 0.1126099949999997 | F | F | F |
| 0.3201376433272571 | 0.1251333177511532 | 0.2553345425815124 | T | T | T |
| 0.4422299849999973 | 0.1250200039999996 | 0.1096900029999972 | F | F | F |
| 0.3202985060833316 | 0.2500430102720057 | 0.2553686851310099 | T | T | T |
| 0.4999699999999976 | 0.1804100109999993 | 0.0370399999999975 | F | F | F |
| 0.3749899829999990 | 0.0576999999999970 | 0.1845799909999997 | F | F | F |
| 0.3076500040000028 | 0.1251000039999965 | 0.1096700009999978 | F | F | F |
| 0.4297091946389691 | 0.2504212361775950 | 0.2563808490243834 | T | T | T |
| 0.6249000039999970 | 0.0695000030000017 | 0.0373500000000035 | F | F | F |
| 0.7499200119999969 | 0.1920800090000014 | 0.1822499960000030 | F | F | F |
| 0.7498800640000027 | 0.0696899969999976 | 0.0370800000000031 | F | F | F |
| 0.6248999929999997 | 0.1924000079999999 | 0.1845499960000012 | F | F | F |
| 0.5576500390000021 | 0.2500900129999977 | 0.1126099949999997 | F | F | F |
| 0.6795003913353866 | 0.1254142679784022 | 0.2554825017778586 | T | T | T |
| 0.6249800009999973 | 0.1805899989999986 | 0.0372699999999995 | F | F | F |
| 0.7499899640000010 | 0.0580100040000033 | 0.1822900009999984 | F | F | F |
| 0.6922500379999974 | 0.2500199979999991 | 0.1126099949999997 | F | F | F |
| 0.5699773120870606 | 0.1250633978976571 | 0.2557836964921099 | T | T | T |
| 0.6922399899999974 | 0.1250200039999996 | 0.1096900029999972 | F | F | F |
| 0.5692473473594313 | 0.2499122985816654 | 0.2550940770738988 | T | T | T |
| 0.7499699859999964 | 0.1803700110000008 | 0.0370299989999978 | F | F | F |
| 0.6249999699999975 | 0.0576799999999977 | 0.1845699980000006 | F | F | F |
| 0.5576500330000016 | 0.1251100089999966 | 0.1096799930000003 | F | F | F |
| 0.6792298205968935 | 0.2500383820652038 | 0.2549327360446558 | T | T | T |
| 0.8748800500000016 | 0.0694900029999985 | 0.0372899979999985 | F | F | F |
| 0.9999100080000005 | 0.1920800090000014 | 0.1822299939999965 | F | F | F |
| 0.9998800509999981 | 0.0697000070000016 | 0.0370599979999966 | F | F | F |
| 0.8749099560000033 | 0.1924000079999999 | 0.1845400039999987 | F | F | F |
| 0.8076900780000003 | 0.2500900129999977 | 0.1125900019999975 | F | F | F |
| 0.9296060817785060 | 0.1251535753155317 | 0.2554240729925283 | T | T | T |
| 0.8749600040000018 | 0.1805800149999968 | 0.0372599989999998 | F | F | F |
| 0.9999799599999974 | 0.0580100040000033 | 0.1822299939999965 | F | F | F |
| 0.9422499659999986 | 0.2500100139999972 | 0.1126000029999972 | F | F | F |
| 0.8200987843929589 | 0.1251156804424293 | 0.2554678464772856 | T | T | T |
| 0.9422299430000010 | 0.1250200039999996 | 0.1096400059999993 | F | F | F |
| 0.8205023818721275 | 0.2501922918761080 | 0.2552551862634866 | T | T | T |
| 0.9999499720000031 | 0.1803400169999989 | 0.0369999999999990 | F | F | F |
| 0.8749900250000024 | 0.0576999999999970 | 0.1845400039999987 | F | F | F |

|                    |                    |                    |   |   |   |
|--------------------|--------------------|--------------------|---|---|---|
| 0.8076400109999966 | 0.1250900089999973 | 0.1096599999999981 | F | F | F |
| 0.9296321330303664 | 0.2500368020531696 | 0.2551441593258289 | T | T | T |
| 0.1249099970000032 | 0.3194700060000031 | 0.0372699999999995 | F | F | F |
| 0.2499100020000000 | 0.4420700330000003 | 0.1822600059999999 | F | F | F |
| 0.2499000039999970 | 0.3196300059999970 | 0.0370100009999987 | F | F | F |
| 0.1249099990000033 | 0.4423600370000003 | 0.1845499960000012 | F | F | F |
| 0.0576699969999979 | 0.5000699900000001 | 0.1125800000000012 | F | F | F |
| 0.1796357530617617 | 0.3750417557563780 | 0.2554776781232641 | T | T | T |
| 0.1249999990000035 | 0.4305000029999988 | 0.0372399970000004 | F | F | F |
| 0.2499700130000022 | 0.3080000069999969 | 0.1822600059999999 | F | F | F |
| 0.1922499860000002 | 0.4999800060000013 | 0.1126200049999966 | F | F | F |
| 0.0702960594722781 | 0.3749637042466319 | 0.2555121162532796 | T | T | T |
| 0.1922300179999965 | 0.3749800340000036 | 0.1096499989999984 | F | F | F |
| 0.0704398853416505 | 0.4999900265248350 | 0.2551136075931318 | T | T | T |
| 0.2499800020000009 | 0.4303300199999995 | 0.0370299989999978 | F | F | F |
| 0.1249800060000013 | 0.3076800300000002 | 0.1845600059999981 | F | F | F |
| 0.0576499989999988 | 0.3750599910000005 | 0.1096400059999993 | F | F | F |
| 0.1794505748087840 | 0.5000420313578159 | 0.2551476029264289 | T | T | T |
| 0.3749099950000030 | 0.3194800119999996 | 0.0372800009999992 | F | F | F |
| 0.4999099690000008 | 0.4420800179999986 | 0.1822600059999999 | F | F | F |
| 0.4999000039999970 | 0.3196300059999970 | 0.0370100009999987 | F | F | F |
| 0.3748999920000031 | 0.4423700210000021 | 0.1845799909999997 | F | F | F |
| 0.3076500080000031 | 0.5000500220000035 | 0.1126099949999997 | F | F | F |
| 0.4294553661429899 | 0.3751575433039991 | 0.2549347219828554 | T | T | T |
| 0.3749800160000021 | 0.4305300400000007 | 0.0372899979999985 | F | F | F |
| 0.4999700219999994 | 0.3080100119999969 | 0.1822699980000024 | F | F | F |
| 0.4422400199999998 | 0.5000000169999979 | 0.1126099949999997 | F | F | F |
| 0.3199488059650414 | 0.3750949223087237 | 0.2554588671121307 | T | T | T |
| 0.4422399970000015 | 0.3750000020000002 | 0.1096700009999978 | F | F | F |
| 0.3205361034682453 | 0.5002312166512805 | 0.2551082952916554 | T | T | T |
| 0.4999700190000027 | 0.4303799819999981 | 0.0370100009999987 | F | F | F |
| 0.3749800029999975 | 0.3077000190000021 | 0.1845699980000006 | F | F | F |
| 0.3076499940000019 | 0.3750599910000005 | 0.1096599999999981 | F | F | F |
| 0.4296336018619284 | 0.5000102281686362 | 0.2550171468998890 | T | T | T |
| 0.6248999909999995 | 0.3194800119999996 | 0.0372899979999985 | F | F | F |
| 0.7499199729999972 | 0.4420800179999986 | 0.1822600059999999 | F | F | F |
| 0.7499000509999973 | 0.3196600209999971 | 0.0370399999999975 | F | F | F |
| 0.6249100049999967 | 0.4423800049999969 | 0.1845799909999997 | F | F | F |
| 0.5576599750000000 | 0.5000800159999983 | 0.1126099949999997 | F | F | F |
| 0.6805044799264931 | 0.3753916652238134 | 0.2541969655718658 | T | T | T |
| 0.6249900039999972 | 0.4305599919999992 | 0.0373200009999977 | F | F | F |
| 0.7499899929999998 | 0.3079900230000021 | 0.1822600059999999 | F | F | F |
| 0.6922500240000034 | 0.5000000169999979 | 0.1126200049999966 | F | F | F |
| 0.5699333993074017 | 0.3755786118698686 | 0.2495423456970810 | T | T | T |

|                    |                    |                    |   |   |   |
|--------------------|--------------------|--------------------|---|---|---|
| 0.6922500270000000 | 0.3749800340000036 | 0.1096799930000003 | F | F | F |
| 0.5701743405538500 | 0.5005941801204022 | 0.2540992855232070 | T | T | T |
| 0.7499600310000005 | 0.4303500299999996 | 0.0370299989999978 | F | F | F |
| 0.6249900239999988 | 0.3076700029999984 | 0.1845699980000006 | F | F | F |
| 0.5576500530000033 | 0.3750800010000006 | 0.1096700009999978 | F | F | F |
| 0.6797639144165158 | 0.5005521532696589 | 0.2548936305428378 | T | T | T |
| 0.8748999780000020 | 0.3194899960000015 | 0.0372699999999995 | F | F | F |
| 0.9999099770000015 | 0.4420900020000005 | 0.1822200009999975 | F | F | F |
| 0.9999099540000032 | 0.3196899949999974 | 0.0369999999999990 | F | F | F |
| 0.8749000090000010 | 0.4423899889999987 | 0.1845499960000012 | F | F | F |
| 0.8076500040000028 | 0.5000699900000001 | 0.1126099949999997 | F | F | F |
| 0.9299289110861199 | 0.3751304090777061 | 0.2554127531427197 | T | T | T |
| 0.8749700830000009 | 0.4305400240000026 | 0.0372599989999998 | F | F | F |
| 0.9999799879999998 | 0.3079900230000021 | 0.1822299939999965 | F | F | F |
| 0.9422299519999981 | 0.5000000169999979 | 0.1125800000000012 | F | F | F |
| 0.8204885471059461 | 0.3750414470800594 | 0.2556193881894300 | T | T | T |
| 0.9422400130000028 | 0.3749700070000017 | 0.1096499989999984 | F | F | F |
| 0.8206784372498565 | 0.4999997281088925 | 0.2551930773904947 | T | T | T |
| 0.9999700520000019 | 0.4303199929999977 | 0.0370299989999978 | F | F | F |
| 0.8750000280000023 | 0.3076700029999984 | 0.1845499960000012 | F | F | F |
| 0.8076600070000026 | 0.3750700169999988 | 0.1096799930000003 | F | F | F |
| 0.9297028716402276 | 0.5001865069195138 | 0.2551422745275323 | T | T | T |
| 0.1249200099999968 | 0.5695000300000004 | 0.0372899979999985 | F | F | F |
| 0.2499099930000028 | 0.6920800469999975 | 0.1822900009999984 | F | F | F |
| 0.2499099950000030 | 0.5696600300000014 | 0.0370500009999972 | F | F | F |
| 0.1248900000000006 | 0.6923800349999993 | 0.1845799909999997 | F | F | F |
| 0.0576400030000030 | 0.7500699770000026 | 0.1126300060000034 | F | F | F |
| 0.1797150818586132 | 0.6250810803945663 | 0.2553636538746389 | T | T | T |
| 0.1249999979999998 | 0.6805800320000017 | 0.0373099999999980 | F | F | F |
| 0.2499800040000011 | 0.5579800049999974 | 0.1822800079999993 | F | F | F |
| 0.1922500069999984 | 0.7500000040000003 | 0.1126399979999988 | F | F | F |
| 0.0702212416441435 | 0.6249558632535784 | 0.2554038096995538 | T | T | T |
| 0.1922500000000014 | 0.6249700369999971 | 0.1096799930000003 | F | F | F |
| 0.0704147184198743 | 0.7499689881564595 | 0.2551598626522208 | T | T | T |
| 0.2499800020000009 | 0.6803500170000021 | 0.0370399999999975 | F | F | F |
| 0.1250000020000002 | 0.5576600070000026 | 0.1845699980000006 | F | F | F |
| 0.0576500000000024 | 0.6250700049999978 | 0.1096599999999981 | F | F | F |
| 0.1794256453152264 | 0.7500675271662223 | 0.2551695103479529 | T | T | T |
| 0.3749200159999972 | 0.5694699940000021 | 0.0373500000000035 | F | F | F |
| 0.4999299899999983 | 0.6920899890000030 | 0.1822900009999984 | F | F | F |
| 0.4999099739999977 | 0.5696600300000014 | 0.0370399999999975 | F | F | F |
| 0.3749000130000013 | 0.6923900609999976 | 0.1845900000000000 | F | F | F |
| 0.3076300070000002 | 0.7500800460000008 | 0.1126399979999988 | F | F | F |
| 0.4298286076221789 | 0.6251845970415724 | 0.2553415926199576 | T | T | T |

|                    |                    |                    |   |   |   |
|--------------------|--------------------|--------------------|---|---|---|
| 0.3749800029999975 | 0.6805600209999980 | 0.0373300019999974 | F | F | F |
| 0.4999799830000029 | 0.5579800049999974 | 0.1822800079999993 | F | F | F |
| 0.4422599899999966 | 0.7500000040000003 | 0.1126399979999988 | F | F | F |
| 0.3203525622189443 | 0.6249577795748809 | 0.2554113478105506 | T | T | T |
| 0.4422499840000000 | 0.6250000309999990 | 0.1097000039999969 | F | F | F |
| 0.3204038170778506 | 0.7499603869765412 | 0.2551864570554837 | T | T | T |
| 0.4999700059999981 | 0.6804100490000025 | 0.0370299989999978 | F | F | F |
| 0.3749899970000001 | 0.5576600070000026 | 0.1845799909999997 | F | F | F |
| 0.3076699849999969 | 0.6250600629999994 | 0.1097000039999969 | F | F | F |
| 0.4294166059818935 | 0.7501422819618221 | 0.2551850799696814 | T | T | T |
| 0.6249099950000030 | 0.5695000300000004 | 0.0373300019999974 | F | F | F |
| 0.7499399769999968 | 0.6920700209999993 | 0.1822499960000030 | F | F | F |
| 0.7498900200000023 | 0.5696500029999996 | 0.0370100009999987 | F | F | F |
| 0.6249200090000002 | 0.6924000030000030 | 0.1845900000000000 | F | F | F |
| 0.5576500370000019 | 0.7500800460000008 | 0.1126300060000034 | F | F | F |
| 0.6798810515598127 | 0.6252995465577278 | 0.2554438012575121 | T | T | T |
| 0.6249900070000010 | 0.6805600209999980 | 0.0372899979999985 | F | F | F |
| 0.7499899540000001 | 0.5579900310000028 | 0.1822600059999999 | F | F | F |
| 0.6922699949999966 | 0.7500000040000003 | 0.1126099949999997 | F | F | F |
| 0.5704421396427619 | 0.6251261245004198 | 0.2554907346414502 | T | T | T |
| 0.6922500049999982 | 0.6250000309999990 | 0.1096700009999978 | F | F | F |
| 0.5704644511347764 | 0.7501644925986733 | 0.2551621728823472 | T | T | T |
| 0.7499799850000031 | 0.6803800120000005 | 0.0370100009999987 | F | F | F |
| 0.6250000020000002 | 0.5576600070000026 | 0.1845799909999997 | F | F | F |
| 0.5576700230000000 | 0.6250800310000031 | 0.1096900029999972 | F | F | F |
| 0.6794759651548603 | 0.7502760233700146 | 0.2551659000109839 | T | T | T |
| 0.8749100160000012 | 0.5695000300000004 | 0.0372800009999992 | F | F | F |
| 0.9999099389999984 | 0.6920899890000030 | 0.1822800079999993 | F | F | F |
| 0.9999000159999980 | 0.5696900240000033 | 0.0370200019999984 | F | F | F |
| 0.8749300050000031 | 0.6923900609999976 | 0.1845900000000000 | F | F | F |
| 0.8076900590000022 | 0.7500600779999971 | 0.1125900019999975 | F | F | F |
| 0.9298236566423288 | 0.6251847949934793 | 0.2553961369664291 | T | T | T |
| 0.8749900110000013 | 0.6805400530000014 | 0.0372800009999992 | F | F | F |
| 0.9999900090000011 | 0.5579800049999974 | 0.1822399859999990 | F | F | F |
| 0.9422699400000027 | 0.7500100720000020 | 0.1126500000000021 | F | F | F |
| 0.8203612466823119 | 0.6250622362719390 | 0.2554882900579339 | T | T | T |
| 0.9422499750000028 | 0.6249900050000008 | 0.1096799930000003 | F | F | F |
| 0.8205280148072321 | 0.7501072529367813 | 0.2551330023556265 | T | T | T |
| 0.9999900059999973 | 0.6803500170000021 | 0.0370299989999978 | F | F | F |
| 0.8749900139999980 | 0.5576800170000027 | 0.1845699980000006 | F | F | F |
| 0.8076599680000029 | 0.6250700049999978 | 0.1096700009999978 | F | F | F |
| 0.9295354217140122 | 0.7502286692848860 | 0.2551700861402424 | T | T | T |
| 0.1249200090000002 | 0.8194700230000009 | 0.0373500000000035 | F | F | F |
| 0.2499199969999992 | 0.9421000449999966 | 0.1822900009999984 | F | F | F |



|                     |                      |                     |   |   |   |
|---------------------|----------------------|---------------------|---|---|---|
| 0.24989999000000030 | 0.8196800269999969   | 0.0370599979999966  | F | F | F |
| 0.12491000600000004 | 0.9424100589999966   | 0.1845600059999981  | F | F | F |
| 0.05766000100000021 | 0.00010000000000033  | 0.11258000000000012 | F | F | F |
| 0.1796277831777054  | 0.8750779318811936   | 0.2554119887579947  | T | T | T |
| 0.1250000029999967  | 0.9305700350000023   | 0.0372899979999985  | F | F | F |
| 0.24998001600000021 | 0.8079900179999981   | 0.1822900009999984  | F | F | F |
| 0.19225999700000007 | 0.0000199999999992   | 0.11265000000000021 | F | F | F |
| 0.0701634343706368  | 0.8749618675880444   | 0.2554023786040960  | T | T | T |
| 0.1922499869999967  | 0.8750000610000015   | 0.10970999700000031 | F | F | F |
| 0.0703469632590590  | 0.9999565849070391   | 0.2551062380862542  | T | T | T |
| 0.2499899979999967  | 0.9304100359999978   | 0.0370399999999975  | F | F | F |
| 0.12499000900000011 | 0.8076700200000033   | 0.18456999800000006 | F | F | F |
| 0.05765000000000024 | 0.8750900020000003   | 0.10967999300000003 | F | F | F |
| 0.1793535445682106  | 0.0000861264692152   | 0.2551697494967815  | T | T | T |
| 0.37489999400000033 | 0.8195000600000029   | 0.0373399989999967  | F | F | F |
| 0.4999200099999968  | 0.9420899759999983   | 0.18229999300000009 | F | F | F |
| 0.4998999769999983  | 0.8196400060000002   | 0.0370599979999966  | F | F | F |
| 0.3748999999999967  | 0.9424200429999985   | 0.18459000000000000 | F | F | F |
| 0.3076599979999983  | 0.00009000000000001  | 0.11263000600000034 | F | F | F |
| 0.4296028074985394  | 0.8750778307549102   | 0.2554192694082273  | T | T | T |
| 0.37498998200000024 | 0.9305999870000008   | 0.03735000000000035 | F | F | F |
| 0.49998997800000021 | 0.8079900179999981   | 0.1822900009999984  | F | F | F |
| 0.44225999700000007 | 0.0000199999999992   | 0.11266000100000018 | F | F | F |
| 0.3201127206343844  | 0.8750004313389784   | 0.2553744891867205  | T | T | T |
| 0.4422400289999970  | 0.8749800080000014   | 0.10971999800000028 | F | F | F |
| 0.3203850282479148  | 0.0000110296459590   | 0.2551990679740296  | T | T | T |
| 0.4999799929999966  | 0.9303600309999993   | 0.0370599979999966  | F | F | F |
| 0.37499999300000030 | 0.8076700200000033   | 0.18457999909999997 | F | F | F |
| 0.30766000100000021 | 0.8750800179999985   | 0.10970999700000031 | F | F | F |
| 0.4293723138435545  | 0.0000891850465971   | 0.2552329486396593  | T | T | T |
| 0.6249000059999972  | 0.8194900760000010   | 0.0373000029999986  | F | F | F |
| 0.74991998000000014 | 0.9420800760000034   | 0.1822800079999993  | F | F | F |
| 0.74991002400000018 | 0.8196400060000002   | 0.0370200019999984  | F | F | F |
| 0.6249100289999987  | 0.9423999899999984   | 0.18456999800000006 | F | F | F |
| 0.55764001000000001 | 0.000090000000000001 | 0.11263000600000034 | F | F | F |
| 0.6797626268042704  | 0.8752400973694018   | 0.2553528488021456  | T | T | T |
| 0.62497999400000003 | 0.9305700350000023   | 0.0373600019999998  | F | F | F |
| 0.74999998300000021 | 0.8079900179999981   | 0.18224999600000030 | F | F | F |
| 0.69226005200000017 | 0.00001000000000032  | 0.1126399979999988  | F | F | F |
| 0.5702279937966527  | 0.8751743387774203   | 0.2553569762379427  | T | T | T |
| 0.6922500249999999  | 0.8749700239999996   | 0.1096700009999978  | F | F | F |
| 0.5704306979009504  | 0.0001055654803441   | 0.2551870923836849  | T | T | T |
| 0.7499700219999994  | 0.9303500469999975   | 0.0370399999999975  | F | F | F |
| 0.6250099969999994  | 0.8076700200000033   | 0.18454999600000012 | F | F | F |

|                    |                    |                    |   |   |   |
|--------------------|--------------------|--------------------|---|---|---|
| 0.5576700180000032 | 0.8750700339999966 | 0.1097000039999969 | F | F | F |
| 0.6794724026243047 | 0.0002702684242210 | 0.2551936518089518 | T | T | T |
| 0.8749099599999965 | 0.8194800070000028 | 0.0373000029999986 | F | F | F |
| 0.9999200700000017 | 0.9421100289999984 | 0.1822299939999965 | F | F | F |
| 0.9999200379999991 | 0.8196999950000006 | 0.0370399999999975 | F | F | F |
| 0.8749000250000023 | 0.9423999899999984 | 0.1845400039999987 | F | F | F |
| 0.8076400309999983 | 0.0000900000000001 | 0.1126300060000034 | F | F | F |
| 0.9297364723399012 | 0.8752426294693206 | 0.2553640896005121 | T | T | T |
| 0.8749700899999979 | 0.9305400829999968 | 0.0372899979999985 | F | F | F |
| 0.9999899959999965 | 0.8080099869999984 | 0.1822800079999993 | F | F | F |
| 0.9422299539999983 | 0.0000100000000032 | 0.1125900019999975 | F | F | F |
| 0.8202597645773266 | 0.8750924057092274 | 0.2553489919265632 | T | T | T |
| 0.9422400460000020 | 0.8750000610000015 | 0.1096700009999978 | F | F | F |
| 0.8203758039882639 | 0.0000570350817882 | 0.2551684260441097 | T | T | T |
| 0.9999700090000019 | 0.9303600309999993 | 0.0370399999999975 | F | F | F |
| 0.8750100270000019 | 0.8076800039999981 | 0.1845600059999981 | F | F | F |
| 0.8076600139999996 | 0.8750700339999966 | 0.1096799930000003 | F | F | F |
| 0.9294207402785811 | 0.0002156280406435 | 0.2551291447098771 | T | T | T |
| 0.4822059297620371 | 0.3200595078140589 | 0.3497819277322471 | T | T | T |
| 0.4336420412098400 | 0.4039787921461159 | 0.3727904107899153 | T | T | T |
| 0.5186134925452437 | 0.4707029591079561 | 0.3692834534987389 | T | T | T |
| 0.6073729933853419 | 0.4251737500910212 | 0.3367641819060673 | T | T | T |
| 0.6215702726394033 | 0.3222179503004787 | 0.3290349602563634 | T | T | T |
| 0.5238187249567376 | 0.3649317344949228 | 0.3513371417744289 | T | T | T |
| 0.4926761121413859 | 0.4170197089197418 | 0.3655138646189263 | T | T | T |
| 0.5839697638961545 | 0.3702586939987069 | 0.3412239163397125 | T | T | T |
| 0.4292146756718245 | 0.3471265137893236 | 0.3615680276615861 | T | T | T |
| 0.5738564754943155 | 0.4718691126075933 | 0.3526920099564448 | T | T | T |
| 0.4846756468461822 | 0.2829600264696208 | 0.3278526303772029 | T | T | T |
| 0.3876959414848067 | 0.3223774733974897 | 0.3612166239901079 | T | T | T |
| 0.5959211938014630 | 0.5149533140464362 | 0.3504498429289920 | T | T | T |
| 0.6649761045751683 | 0.3313583872589665 | 0.3376918557689444 | T | T | T |
| 0.6081695741145781 | 0.2824484985290328 | 0.3436065793619432 | T | T | T |

**Data S2.** CONTCAR of adenine adsorbed on C-100.

CONTCAR-adenine adsorbed on Co<sub>3</sub>O<sub>4</sub>-(111)

1.0000000000000000

22.5426006317000009 0.0000000000000000 0.0000000000000000

-11.2648970034999998 19.5256979472999994 0.0000000000000000

0.0000000000000000 0.0000000000000000 28.6224002838000011

Co O N C H

192 256 5 5 5

Selective dynamics

Direct

|                    |                    |                    |   |   |   |
|--------------------|--------------------|--------------------|---|---|---|
| 0.1668999919999976 | 0.0830999960000014 | 0.0232800010000034 | F | F | F |
| 0.0834599969999985 | 0.1665399930000007 | 0.1798300000000026 | F | F | F |
| 0.0415299969999978 | 0.0824600010000012 | 0.0799200020000015 | F | F | F |
| 0.2081000040000021 | 0.1659599939999978 | 0.2431900139999996 | F | F | F |
| 0.1675299999999993 | 0.2084700030000022 | 0.0799299979999972 | F | F | F |
| 0.0840400040000020 | 0.0418899989999986 | 0.2431900139999996 | F | F | F |
| 0.1668300030000012 | 0.0831499980000032 | 0.1420000099999967 | F | F | F |
| 0.0833696508700193 | 0.1665472409696183 | 0.2941504502794575 | T | T | T |
| 0.0414899940000026 | 0.2084999920000001 | 0.0799200020000015 | F | F | F |
| 0.2081000089999989 | 0.0418999999999983 | 0.2432200009999974 | F | F | F |
| 0.0834799969999978 | 0.1665299920000010 | 0.0030100000000033 | F | F | F |
| 0.0000899989999965 | 0.2498999929999997 | 0.1612100050000009 | F | F | F |
| 0.4168999819999968 | 0.0830999960000014 | 0.0232800010000034 | F | F | F |
| 0.3334600020000025 | 0.1665399930000007 | 0.1798300000000026 | F | F | F |
| 0.2915300020000018 | 0.0824600010000012 | 0.0799200020000015 | F | F | F |
| 0.4580999940000012 | 0.1659599939999978 | 0.2431900139999996 | F | F | F |
| 0.4175299999999993 | 0.2084700030000022 | 0.0799299979999972 | F | F | F |
| 0.3340399770000033 | 0.0418899989999986 | 0.2431900139999996 | F | F | F |
| 0.4168299930000003 | 0.0831499980000032 | 0.1420000099999967 | F | F | F |
| 0.3333303706891463 | 0.1664181134228004 | 0.2941072719431009 | T | T | T |
| 0.2914899840000018 | 0.2084999920000001 | 0.0799200020000015 | F | F | F |
| 0.4580999880000007 | 0.0418999999999983 | 0.2432200009999974 | F | F | F |
| 0.3334800080000022 | 0.1665299920000010 | 0.0030100000000033 | F | F | F |
| 0.2500899989999965 | 0.2498999929999997 | 0.1612100050000009 | F | F | F |
| 0.6668999600000021 | 0.0830999960000014 | 0.0232800010000034 | F | F | F |
| 0.5834599809999972 | 0.1665399930000007 | 0.1798300000000026 | F | F | F |
| 0.5415300020000018 | 0.0824600010000012 | 0.0799200020000015 | F | F | F |
| 0.7081000149999994 | 0.1659599939999978 | 0.2431900139999996 | F | F | F |
| 0.6675299790000011 | 0.2084700030000022 | 0.0799299979999972 | F | F | F |
| 0.5840399770000033 | 0.0418899989999986 | 0.2431900139999996 | F | F | F |
| 0.6668300139999985 | 0.0831499980000032 | 0.1420000099999967 | F | F | F |
| 0.5834018870772796 | 0.1664557930911784 | 0.2941547853226460 | T | T | T |
| 0.5414900259999982 | 0.2084999920000001 | 0.0799200020000015 | F | F | F |
| 0.7081000089999989 | 0.0418999999999983 | 0.2432200009999974 | F | F | F |

|                    |                    |                    |   |   |   |
|--------------------|--------------------|--------------------|---|---|---|
| 0.5834799860000004 | 0.1665299920000010 | 0.0030100000000033 | F | F | F |
| 0.5000899779999983 | 0.2498999929999997 | 0.1612100050000009 | F | F | F |
| 0.9168999389999968 | 0.0830999960000014 | 0.0232800010000034 | F | F | F |
| 0.8334599180000026 | 0.1665399930000007 | 0.1798300000000026 | F | F | F |
| 0.7915300230000000 | 0.0824600010000012 | 0.0799200020000015 | F | F | F |
| 0.9581000359999976 | 0.1659599939999978 | 0.2431900139999996 | F | F | F |
| 0.9175299999999993 | 0.2084700030000022 | 0.0799299979999972 | F | F | F |
| 0.8340399980000015 | 0.0418899989999986 | 0.2431900139999996 | F | F | F |
| 0.9168299930000003 | 0.0831499980000032 | 0.1420000099999967 | F | F | F |
| 0.8334177169701429 | 0.1665597896680379 | 0.2941930849081382 | T | T | T |
| 0.7914900050000000 | 0.2084999920000001 | 0.0799200020000015 | F | F | F |
| 0.9580999880000007 | 0.0418999999999983 | 0.2432200009999974 | F | F | F |
| 0.8334799650000022 | 0.1665299920000010 | 0.0030100000000033 | F | F | F |
| 0.7500899989999965 | 0.2498999929999997 | 0.1612100050000009 | F | F | F |
| 0.1668999839999969 | 0.3330999869999971 | 0.0232800010000034 | F | F | F |
| 0.0834599989999987 | 0.4165300259999967 | 0.1798300000000026 | F | F | F |
| 0.0415299909999973 | 0.3324599849999998 | 0.0799200020000015 | F | F | F |
| 0.2080999989999981 | 0.4159599910000011 | 0.2431900139999996 | F | F | F |
| 0.1675299830000014 | 0.4584699749999999 | 0.0799299979999972 | F | F | F |
| 0.0840399960000013 | 0.2918899809999971 | 0.2431900139999996 | F | F | F |
| 0.1668300010000010 | 0.3331500009999999 | 0.1420000099999967 | F | F | F |
| 0.0834694359209014 | 0.4166074088023297 | 0.2942096328025497 | T | T | T |
| 0.0414900009999997 | 0.4585000129999983 | 0.0799200020000015 | F | F | F |
| 0.2080999909999974 | 0.2918999939999978 | 0.2432200009999974 | F | F | F |
| 0.0834800100000024 | 0.4165300259999967 | 0.0030100000000033 | F | F | F |
| 0.0000899950000033 | 0.4999000139999978 | 0.1612100050000009 | F | F | F |
| 0.4168999839999969 | 0.3330999869999971 | 0.0232800010000034 | F | F | F |
| 0.3334599860000012 | 0.4165399899999969 | 0.1798300000000026 | F | F | F |
| 0.2915300009999982 | 0.3324599849999998 | 0.0799200020000015 | F | F | F |
| 0.4580999779999999 | 0.4159599910000011 | 0.2431900139999996 | F | F | F |
| 0.4175299930000023 | 0.4584699749999999 | 0.0799299979999972 | F | F | F |
| 0.3340399750000032 | 0.2918899809999971 | 0.2431900139999996 | F | F | F |
| 0.4168299800000028 | 0.3331500009999999 | 0.1420000099999967 | F | F | F |
| 0.3337672639738108 | 0.4175299081604700 | 0.2945274311080686 | T | T | T |
| 0.2914899800000015 | 0.4585000129999983 | 0.0799200020000015 | F | F | F |
| 0.4580999699999992 | 0.2918999939999978 | 0.2432200009999974 | F | F | F |
| 0.3334800100000024 | 0.4165300259999967 | 0.0030100000000033 | F | F | F |
| 0.2500899950000033 | 0.4999000139999978 | 0.1612100050000009 | F | F | F |
| 0.6668999629999988 | 0.3330999869999971 | 0.0232800010000034 | F | F | F |
| 0.5834599439999977 | 0.4165399899999969 | 0.1798300000000026 | F | F | F |
| 0.5415300009999982 | 0.3324599849999998 | 0.0799200020000015 | F | F | F |
| 0.7080999779999999 | 0.4159599910000011 | 0.2431900139999996 | F | F | F |
| 0.6675299719999970 | 0.4584699749999999 | 0.0799299979999972 | F | F | F |
| 0.5840399750000032 | 0.2918899809999971 | 0.2431900139999996 | F | F | F |

|                    |                    |                    |   |   |   |
|--------------------|--------------------|--------------------|---|---|---|
| 0.6668300219999992 | 0.3331500009999999 | 0.1420000099999967 | F | F | F |
| 0.5837432984174691 | 0.4163350310471298 | 0.2931862478669993 | T | T | T |
| 0.5414900219999979 | 0.4585000129999983 | 0.0799200020000015 | F | F | F |
| 0.7081000129999993 | 0.2918999939999978 | 0.2432200009999974 | F | F | F |
| 0.5834800100000024 | 0.4165300259999967 | 0.0030100000000033 | F | F | F |
| 0.5000899739999980 | 0.4999000139999978 | 0.1612100050000009 | F | F | F |
| 0.9168999839999969 | 0.3330999869999971 | 0.0232800010000034 | F | F | F |
| 0.8334599650000030 | 0.4165399899999969 | 0.1798300000000026 | F | F | F |
| 0.7915300220000034 | 0.3324599849999998 | 0.0799200020000015 | F | F | F |
| 0.9580999989999981 | 0.4159599910000011 | 0.2431900139999996 | F | F | F |
| 0.9175299509999988 | 0.4584699749999999 | 0.0799299979999972 | F | F | F |
| 0.8340399539999979 | 0.2918899809999971 | 0.2431900139999996 | F | F | F |
| 0.9168299589999975 | 0.3331500009999999 | 0.1420000099999967 | F | F | F |
| 0.8335275277638295 | 0.4166010242675982 | 0.2941315452161178 | T | T | T |
| 0.7914900219999979 | 0.4585000129999983 | 0.0799200020000015 | F | F | F |
| 0.9581000339999974 | 0.2918999939999978 | 0.2432200009999974 | F | F | F |
| 0.8334800310000006 | 0.4165300259999967 | 0.0030100000000033 | F | F | F |
| 0.7500899739999980 | 0.4999000139999978 | 0.1612100050000009 | F | F | F |
| 0.1668999910000011 | 0.5830900200000002 | 0.0232800010000034 | F | F | F |
| 0.0834599829999974 | 0.6665400110000022 | 0.1798300000000026 | F | F | F |
| 0.0415299940000011 | 0.5824599580000012 | 0.0799200020000015 | F | F | F |
| 0.2080999949999978 | 0.6659600119999993 | 0.2431900139999996 | F | F | F |
| 0.1675299890000019 | 0.7084699970000017 | 0.0799299979999972 | F | F | F |
| 0.0840400049999985 | 0.5418900270000009 | 0.2431900139999996 | F | F | F |
| 0.1668299849999997 | 0.5831499980000032 | 0.1420000099999967 | F | F | F |
| 0.0834335345075326 | 0.6665605064792232 | 0.2941892919096336 | T | T | T |
| 0.0414899760000011 | 0.7085000350000001 | 0.0799200020000015 | F | F | F |
| 0.2080999969999979 | 0.5418999910000011 | 0.2432200009999974 | F | F | F |
| 0.0834799820000001 | 0.6665299989999980 | 0.0030100000000033 | F | F | F |
| 0.0000899879999992 | 0.7498999869999992 | 0.1612100050000009 | F | F | F |
| 0.4168999919999976 | 0.5831000319999973 | 0.0232800010000034 | F | F | F |
| 0.3334599829999974 | 0.6665400110000022 | 0.1798300000000026 | F | F | F |
| 0.2915299940000011 | 0.5824599580000012 | 0.0799200020000015 | F | F | F |
| 0.4580999739999996 | 0.6659600119999993 | 0.2431900139999996 | F | F | F |
| 0.4175300109999966 | 0.7084699970000017 | 0.0799299979999972 | F | F | F |
| 0.3340399829999967 | 0.5418900270000009 | 0.2431900139999996 | F | F | F |
| 0.4168299640000015 | 0.5831499980000032 | 0.1420000099999967 | F | F | F |
| 0.3335676265920104 | 0.6664799593408446 | 0.2944899369371503 | T | T | T |
| 0.2914899760000011 | 0.7085000350000001 | 0.0799200020000015 | F | F | F |
| 0.4580999759999997 | 0.5418999910000011 | 0.2432200009999974 | F | F | F |
| 0.3334799820000001 | 0.6665299989999980 | 0.0030100000000033 | F | F | F |
| 0.2500900100000010 | 0.7498999869999992 | 0.1612100050000009 | F | F | F |
| 0.6668999500000012 | 0.5831000319999973 | 0.0232800010000034 | F | F | F |
| 0.5834599619999992 | 0.6665400110000022 | 0.1798300000000026 | F | F | F |

|                    |                    |                    |   |   |   |
|--------------------|--------------------|--------------------|---|---|---|
| 0.5415299940000011 | 0.5824599580000012 | 0.0799200020000015 | F | F | F |
| 0.7080999949999978 | 0.6659600119999993 | 0.2431900139999996 | F | F | F |
| 0.6675299890000019 | 0.7084699970000017 | 0.0799299979999972 | F | F | F |
| 0.5840399829999967 | 0.5418900270000009 | 0.2431900139999996 | F | F | F |
| 0.6668299849999997 | 0.5831499980000032 | 0.1420000099999967 | F | F | F |
| 0.5830532195893496 | 0.6663637540398570 | 0.2957059811045403 | T | T | T |
| 0.5414900190000012 | 0.7085000350000001 | 0.0799200020000015 | F | F | F |
| 0.7080999759999997 | 0.5418999910000011 | 0.2432200009999974 | F | F | F |
| 0.5834799610000019 | 0.6665299989999980 | 0.0030100000000033 | F | F | F |
| 0.5000899879999992 | 0.7498999869999992 | 0.1612100050000009 | F | F | F |
| 0.9168999709999994 | 0.5831000319999973 | 0.0232800010000034 | F | F | F |
| 0.8334599399999973 | 0.6665400110000022 | 0.1798300000000026 | F | F | F |
| 0.7915300160000029 | 0.5824599580000012 | 0.0799200020000015 | F | F | F |
| 0.9581000160000031 | 0.6659600119999993 | 0.2431900139999996 | F | F | F |
| 0.9175299679999966 | 0.7084699970000017 | 0.0799299979999972 | F | F | F |
| 0.8340399410000003 | 0.5418900270000009 | 0.2431900139999996 | F | F | F |
| 0.9168299640000015 | 0.5831499980000032 | 0.1420000099999967 | F | F | F |
| 0.8334939932005395 | 0.6667885733981977 | 0.2941978655895843 | T | T | T |
| 0.7914899980000030 | 0.7085000350000001 | 0.0799200020000015 | F | F | F |
| 0.9580999969999979 | 0.5418999910000011 | 0.2432200009999974 | F | F | F |
| 0.8334799820000001 | 0.6665299989999980 | 0.0030100000000033 | F | F | F |
| 0.7500900100000010 | 0.7498999869999992 | 0.1612100050000009 | F | F | F |
| 0.1668999429999971 | 0.8331000049999986 | 0.0232800010000034 | F | F | F |
| 0.0834600210000005 | 0.9165400329999969 | 0.1798300000000026 | F | F | F |
| 0.0415300120000026 | 0.8324599789999994 | 0.0799200020000015 | F | F | F |
| 0.2080999880000007 | 0.9159599850000006 | 0.2431900139999996 | F | F | F |
| 0.1675300070000034 | 0.9584700179999999 | 0.0799299979999972 | F | F | F |
| 0.0840399759999997 | 0.7918899989999986 | 0.2431900139999996 | F | F | F |
| 0.1668300030000012 | 0.8331500190000014 | 0.1420000099999967 | F | F | F |
| 0.0834108529566145 | 0.9165588036243041 | 0.2941882739036045 | T | T | T |
| 0.0414899700000007 | 0.9585000069999978 | 0.0799200020000015 | F | F | F |
| 0.2080999690000027 | 0.7918999629999988 | 0.2432200009999974 | F | F | F |
| 0.0834799539999977 | 0.9165299710000028 | 0.0030100000000033 | F | F | F |
| 0.0000899389999987 | 0.9998999589999968 | 0.1612100050000009 | F | F | F |
| 0.4168999640000024 | 0.8331000049999986 | 0.0232800010000034 | F | F | F |
| 0.3334599639999993 | 0.9165299710000028 | 0.1798300000000026 | F | F | F |
| 0.2915300120000026 | 0.8324599789999994 | 0.0799200020000015 | F | F | F |
| 0.4580999670000026 | 0.9159599850000006 | 0.2431900139999996 | F | F | F |
| 0.4175300280000016 | 0.9584700179999999 | 0.0799299979999972 | F | F | F |
| 0.3340399550000015 | 0.7918899989999986 | 0.2431900139999996 | F | F | F |
| 0.4168299809999993 | 0.8331500190000014 | 0.1420000099999967 | F | F | F |
| 0.3334197294026949 | 0.9165447442715708 | 0.2941894582342134 | T | T | T |
| 0.2914899700000007 | 0.9585000069999978 | 0.0799200020000015 | F | F | F |
| 0.4580999470000009 | 0.7918999629999988 | 0.2432200009999974 | F | F | F |

|                    |                    |                    |   |   |   |
|--------------------|--------------------|--------------------|---|---|---|
| 0.3334799750000030 | 0.9165299710000028 | 0.0030100000000033 | F | F | F |
| 0.2500899599999968 | 0.9998999589999968 | 0.1612100050000009 | F | F | F |
| 0.6668999429999971 | 0.8331000049999986 | 0.0232800010000034 | F | F | F |
| 0.5834599789999970 | 0.9165400329999969 | 0.1798300000000026 | F | F | F |
| 0.5415300120000026 | 0.8324599789999994 | 0.0799200020000015 | F | F | F |
| 0.7080999880000007 | 0.9159599850000006 | 0.2431900139999996 | F | F | F |
| 0.6675300070000034 | 0.9584700179999999 | 0.0799299979999972 | F | F | F |
| 0.5840399550000015 | 0.7918899989999986 | 0.2431900139999996 | F | F | F |
| 0.6668300030000012 | 0.8331500190000014 | 0.1420000099999967 | F | F | F |
| 0.5833632597331121 | 0.9165141554586630 | 0.2942256527894864 | T | T | T |
| 0.5414900119999970 | 0.9585000069999978 | 0.0799200020000015 | F | F | F |
| 0.7080999690000027 | 0.7918999629999988 | 0.2432200009999974 | F | F | F |
| 0.5834799539999977 | 0.9165299710000028 | 0.0030100000000033 | F | F | F |
| 0.5000899389999987 | 0.9998999589999968 | 0.1612100050000009 | F | F | F |
| 0.9168999219999989 | 0.8331000049999986 | 0.0232800010000034 | F | F | F |
| 0.8334599579999988 | 0.9165400329999969 | 0.1798300000000026 | F | F | F |
| 0.7915300330000008 | 0.8324599789999994 | 0.0799200020000015 | F | F | F |
| 0.9581000089999989 | 0.9159599850000006 | 0.2431900139999996 | F | F | F |
| 0.9175299859999981 | 0.9584700179999999 | 0.0799299979999972 | F | F | F |
| 0.8340399340000033 | 0.7918899989999986 | 0.2431900139999996 | F | F | F |
| 0.9168299809999993 | 0.8331500190000014 | 0.1420000099999967 | F | F | F |
| 0.8334221787901077 | 0.9165777555909050 | 0.2941970593119222 | T | T | T |
| 0.7914899909999988 | 0.9585000069999978 | 0.0799200020000015 | F | F | F |
| 0.9580999900000009 | 0.7918999629999988 | 0.2432200009999974 | F | F | F |
| 0.8334799750000030 | 0.9165299710000028 | 0.0030100000000033 | F | F | F |
| 0.7500899599999968 | 0.9998999589999968 | 0.1612100050000009 | F | F | F |
| 0.2114599989999988 | 0.0385299989999979 | 0.1190500060000019 | F | F | F |
| 0.1265971371650535 | 0.1233985871824941 | 0.2783836125006684 | T | T | T |
| 0.0047899990000033 | 0.1271499989999967 | 0.0387400030000009 | F | F | F |
| 0.1728399980000006 | 0.2113299960000035 | 0.2022899959999975 | F | F | F |
| 0.2115099939999965 | 0.1724699990000005 | 0.1191200009999989 | F | F | F |
| 0.1266029191949216 | 0.0029406523348980 | 0.2784155534768602 | T | T | T |
| 0.0775099949999998 | 0.0384799970000032 | 0.1191200009999989 | F | F | F |
| 0.2469443806991547 | 0.1233750560828641 | 0.2784101860454815 | T | T | T |
| 0.0001699979999970 | 0.2498199899999989 | 0.0462899999999991 | F | F | F |
| 0.1667300009999977 | 0.0832699959999985 | 0.2062699860000023 | F | F | F |
| 0.1228499999999997 | 0.2452100120000011 | 0.0387400030000009 | F | F | F |
| 0.0386699969999995 | 0.0771600019999994 | 0.2022899959999975 | F | F | F |
| 0.1229199989999969 | 0.1270699960000030 | 0.0387100040000021 | F | F | F |
| 0.0387299850000034 | 0.2112699930000019 | 0.2023200000000003 | F | F | F |
| 0.0835199970000033 | 0.1664700019999970 | 0.1144300050000027 | F | F | F |
| 0.2500902306712283 | 0.9999170213837245 | 0.2753388542363992 | T | T | T |
| 0.4614600199999970 | 0.0385299989999979 | 0.1190500060000019 | F | F | F |
| 0.3766853415084219 | 0.1234007363323066 | 0.2783851527384245 | T | T | T |

|                    |                    |                    |   |   |   |
|--------------------|--------------------|--------------------|---|---|---|
| 0.2547900140000010 | 0.1271499989999967 | 0.0387400030000009 | F | F | F |
| 0.4228399879999998 | 0.2113299960000035 | 0.2022899959999975 | F | F | F |
| 0.4615100150000018 | 0.1724699990000005 | 0.1191200009999989 | F | F | F |
| 0.3766007701931426 | 0.0029313788233104 | 0.2784100165486083 | T | T | T |
| 0.3275099949999998 | 0.0384799970000032 | 0.1191200009999989 | F | F | F |
| 0.4970041926001418 | 0.1233851408047526 | 0.2784124297832565 | T | T | T |
| 0.2501599929999969 | 0.2498199899999989 | 0.0462899999999991 | F | F | F |
| 0.4167299590000013 | 0.0832699959999985 | 0.2062699860000023 | F | F | F |
| 0.3728499999999997 | 0.2452100120000011 | 0.0387400030000009 | F | F | F |
| 0.2886700020000035 | 0.0771600019999994 | 0.2022899959999975 | F | F | F |
| 0.3729200040000009 | 0.1270699960000030 | 0.0387100040000021 | F | F | F |
| 0.2887299790000029 | 0.2112699930000019 | 0.2023200000000003 | F | F | F |
| 0.3335199819999985 | 0.1664700019999970 | 0.1144300050000027 | F | F | F |
| 0.5000904907429379 | 0.9999156022880057 | 0.2753314438847947 | T | T | T |
| 0.7114599989999988 | 0.0385299989999979 | 0.1190500060000019 | F | F | F |
| 0.6266442254965164 | 0.1233543847059760 | 0.2783962293452009 | T | T | T |
| 0.5047899719999975 | 0.1271499989999967 | 0.0387400030000009 | F | F | F |
| 0.6728400089999980 | 0.2113299960000035 | 0.2022899959999975 | F | F | F |
| 0.7115099939999965 | 0.1724699990000005 | 0.1191200009999989 | F | F | F |
| 0.6266070123307603 | 0.0029149710395611 | 0.2784069565267375 | T | T | T |
| 0.5775099949999998 | 0.0384799970000032 | 0.1191200009999989 | F | F | F |
| 0.7470255028273988 | 0.1233722204539682 | 0.2784104814143575 | T | T | T |
| 0.5001699769999988 | 0.2498199899999989 | 0.0462899999999991 | F | F | F |
| 0.6667299799999995 | 0.0832699959999985 | 0.2062699860000023 | F | F | F |
| 0.6228500209999979 | 0.2452100120000011 | 0.0387400030000009 | F | F | F |
| 0.5386699809999982 | 0.0771600019999994 | 0.2022899959999975 | F | F | F |
| 0.6229199619999974 | 0.1270699960000030 | 0.0387100040000021 | F | F | F |
| 0.5387300009999976 | 0.2112699930000019 | 0.2023200000000003 | F | F | F |
| 0.5835200240000020 | 0.1664700019999970 | 0.1144300050000027 | F | F | F |
| 0.7500899872125580 | 0.9999076752285357 | 0.2753294915405873 | T | T | T |
| 0.9614600199999970 | 0.0385299989999979 | 0.1190500060000019 | F | F | F |
| 0.8766031737756890 | 0.1233948958455894 | 0.2783866881057920 | T | T | T |
| 0.7547899509999993 | 0.1271499989999967 | 0.0387400030000009 | F | F | F |
| 0.9228399449999998 | 0.2113299960000035 | 0.2022899959999975 | F | F | F |
| 0.9615099729999983 | 0.1724699990000005 | 0.1191200009999989 | F | F | F |
| 0.8766137548732734 | 0.0029681384099735 | 0.2784139089281436 | T | T | T |
| 0.8275100170000016 | 0.0384799970000032 | 0.1191200009999989 | F | F | F |
| 0.9969896292967327 | 0.1233614651334572 | 0.2784072426776283 | T | T | T |
| 0.7501699560000006 | 0.2498199899999989 | 0.0462899999999991 | F | F | F |
| 0.9167299590000013 | 0.0832699959999985 | 0.2062699860000023 | F | F | F |
| 0.8728499999999997 | 0.2452100120000011 | 0.0387400030000009 | F | F | F |
| 0.7886700020000035 | 0.0771600019999994 | 0.2022899959999975 | F | F | F |
| 0.8729199830000027 | 0.1270699960000030 | 0.0387100040000021 | F | F | F |
| 0.7887299790000029 | 0.2112699930000019 | 0.2023200000000003 | F | F | F |



|                    |                    |                    |   |   |   |
|--------------------|--------------------|--------------------|---|---|---|
| 0.8335200450000002 | 0.1664700019999970 | 0.1144300050000027 | F | F | F |
| 0.0000896077349570 | 0.9999132790028131 | 0.2753313082401193 | T | T | T |
| 0.2114599820000009 | 0.2885299929999974 | 0.1190500060000019 | F | F | F |
| 0.1266072797177020 | 0.3733767115145172 | 0.2783848348490240 | T | T | T |
| 0.0047899710000010 | 0.3771499839999990 | 0.0387400030000009 | F | F | F |
| 0.1728399810000028 | 0.4613299680000011 | 0.2022899959999975 | F | F | F |
| 0.2115099780000023 | 0.4224699959999967 | 0.1191200009999989 | F | F | F |
| 0.1266478314505112 | 0.2529734651981086 | 0.2784252414778143 | T | T | T |
| 0.0775099889999993 | 0.2884800029999965 | 0.1191200009999989 | F | F | F |
| 0.2473315222602656 | 0.3733387821471504 | 0.2782102487076101 | T | T | T |
| 0.0001699950000003 | 0.4998200109999971 | 0.0462899999999991 | F | F | F |
| 0.1667299909999969 | 0.3332700059999993 | 0.2062699860000023 | F | F | F |
| 0.1228499830000018 | 0.4951999970000003 | 0.0387400030000009 | F | F | F |
| 0.0386699829999984 | 0.3271599919999986 | 0.2022899959999975 | F | F | F |
| 0.1229199949999966 | 0.3770700050000002 | 0.0387100040000021 | F | F | F |
| 0.0387299850000034 | 0.4612699899999981 | 0.2023200000000003 | F | F | F |
| 0.0835200080000007 | 0.4164699990000003 | 0.1144300050000027 | F | F | F |
| 0.2501143843369770 | 0.2499341694388151 | 0.2754185004682654 | T | T | T |
| 0.4614600029999991 | 0.2885299929999974 | 0.1190500060000019 | F | F | F |
| 0.3762847705790516 | 0.3731333472943529 | 0.2785919244189085 | T | T | T |
| 0.2547899919999992 | 0.3771499839999990 | 0.0387400030000009 | F | F | F |
| 0.4228399599999975 | 0.4613299680000011 | 0.2022899959999975 | F | F | F |
| 0.4615099990000004 | 0.4224699959999967 | 0.1191200009999989 | F | F | F |
| 0.3766496197457721 | 0.2529773549570826 | 0.2785363057583991 | T | T | T |
| 0.3275099840000024 | 0.2884800029999965 | 0.1191200009999989 | F | F | F |
| 0.4966328994796302 | 0.3735506552961362 | 0.2790253098594205 | T | T | T |
| 0.2501599900000002 | 0.4998200109999971 | 0.0462899999999991 | F | F | F |
| 0.4167299699999987 | 0.3332700059999993 | 0.2062699860000023 | F | F | F |
| 0.3728499730000010 | 0.4951999970000003 | 0.0387400030000009 | F | F | F |
| 0.2886699829999984 | 0.3271599919999986 | 0.2022899959999975 | F | F | F |
| 0.3729199949999966 | 0.3770700050000002 | 0.0387100040000021 | F | F | F |
| 0.2887299850000034 | 0.4612699899999981 | 0.2023200000000003 | F | F | F |
| 0.3335199870000025 | 0.4164699990000003 | 0.1144300050000027 | F | F | F |
| 0.5000787772364890 | 0.2499792866200912 | 0.2754107224816676 | T | T | T |
| 0.7114599610000027 | 0.2885299929999974 | 0.1190500060000019 | F | F | F |
| 0.6269163355082087 | 0.3730136170969131 | 0.2784287512188814 | T | T | T |
| 0.5047899710000010 | 0.3771499839999990 | 0.0387400030000009 | F | F | F |
| 0.6728399599999975 | 0.4613299680000011 | 0.2022899959999975 | F | F | F |
| 0.7115099990000004 | 0.4224699959999967 | 0.1191200009999989 | F | F | F |
| 0.6265820806378287 | 0.2528491367730319 | 0.2784013331193054 | T | T | T |
| 0.5775100050000006 | 0.2884800029999965 | 0.1191200009999989 | F | F | F |
| 0.7471336610400360 | 0.3733975544783370 | 0.2784064148635538 | T | T | T |
| 0.5001699740000021 | 0.4998200109999971 | 0.0462899999999991 | F | F | F |
| 0.6667299909999969 | 0.3332700059999993 | 0.2062699860000023 | F | F | F |

|                    |                    |                    |   |   |   |
|--------------------|--------------------|--------------------|---|---|---|
| 0.6228500260000018 | 0.4952100089999973 | 0.0387400030000009 | F | F | F |
| 0.5386699829999984 | 0.3271599919999986 | 0.2022899959999975 | F | F | F |
| 0.6229199730000019 | 0.3770700050000002 | 0.0387100040000021 | F | F | F |
| 0.5387300060000015 | 0.4612699899999981 | 0.2023200000000003 | F | F | F |
| 0.5835199870000025 | 0.4164699990000003 | 0.1144300050000027 | F | F | F |
| 0.7500906599717507 | 0.2499111483991477 | 0.2753327814582595 | T | T | T |
| 0.9614599820000009 | 0.2885299929999974 | 0.1190500060000019 | F | F | F |
| 0.8766331212016186 | 0.3733542229097551 | 0.2783894979179379 | T | T | T |
| 0.7547899500000028 | 0.3771499839999990 | 0.0387400030000009 | F | F | F |
| 0.9228399810000028 | 0.4613299680000011 | 0.2022899959999975 | F | F | F |
| 0.9615100210000023 | 0.4224699959999967 | 0.1191200009999989 | F | F | F |
| 0.8766150622503058 | 0.2529444879286528 | 0.2784065463850055 | T | T | T |
| 0.8275100259999988 | 0.2884800029999965 | 0.1191200009999989 | F | F | F |
| 0.9970733787948169 | 0.3733941085919946 | 0.2784005528753648 | T | T | T |
| 0.7501699740000021 | 0.4998200109999971 | 0.0462899999999991 | F | F | F |
| 0.9167299280000023 | 0.3332700059999993 | 0.2062699860000023 | F | F | F |
| 0.8728500470000000 | 0.4952100089999973 | 0.0387400030000009 | F | F | F |
| 0.7886700039999965 | 0.3271599919999986 | 0.2022899959999975 | F | F | F |
| 0.8729199949999966 | 0.3770700050000002 | 0.0387100040000021 | F | F | F |
| 0.7887299850000034 | 0.4612699899999981 | 0.2023200000000003 | F | F | F |
| 0.8335200080000007 | 0.4164699990000003 | 0.1144300050000027 | F | F | F |
| 0.0000919068479768 | 0.2499131944104117 | 0.2753310938277351 | T | T | T |
| 0.2114599869999978 | 0.5385299900000007 | 0.1190500060000019 | F | F | F |
| 0.1266229574932052 | 0.6233961395774655 | 0.2783813631808348 | T | T | T |
| 0.0047899890000025 | 0.6271500049999972 | 0.0387400030000009 | F | F | F |
| 0.1728399770000024 | 0.7113299889999993 | 0.2022899959999975 | F | F | F |
| 0.2115099920000034 | 0.6724699680000015 | 0.1191200009999989 | F | F | F |
| 0.1266209920068767 | 0.5029921005317607 | 0.2784012257028602 | T | T | T |
| 0.0775099769999983 | 0.5384799750000013 | 0.1191200009999989 | F | F | F |
| 0.2471658116935872 | 0.6234863692668675 | 0.2784227704196907 | T | T | T |
| 0.0001699450000032 | 0.7498199839999984 | 0.0462899999999991 | F | F | F |
| 0.1667299750000026 | 0.5832700030000026 | 0.2062699860000023 | F | F | F |
| 0.1228499770000013 | 0.7452099819999987 | 0.0387400030000009 | F | F | F |
| 0.0386700009999998 | 0.5771600140000004 | 0.2022899959999975 | F | F | F |
| 0.1229199790000024 | 0.6270700019999964 | 0.0387100040000021 | F | F | F |
| 0.0387299779999992 | 0.7112699629999994 | 0.2023200000000003 | F | F | F |
| 0.0835199799999984 | 0.6664699720000016 | 0.1144300050000027 | F | F | F |
| 0.2500733904758759 | 0.4998728980619439 | 0.2752787551976364 | T | T | T |
| 0.4614600080000031 | 0.5385299900000007 | 0.1190500060000019 | F | F | F |
| 0.3766350670692886 | 0.6234248887698683 | 0.2782590026515293 | T | T | T |
| 0.2547900100000007 | 0.6271500049999972 | 0.0387400030000009 | F | F | F |
| 0.4228399559999971 | 0.7113299889999993 | 0.2022899959999975 | F | F | F |
| 0.4615100139999981 | 0.6724699680000015 | 0.1191200009999989 | F | F | F |
| 0.3768898709509177 | 0.5036404761068110 | 0.2778323268885187 | T | T | T |

|                    |                    |                    |   |   |   |
|--------------------|--------------------|--------------------|---|---|---|
| 0.3275099769999983 | 0.5384799750000013 | 0.1191200009999989 | F | F | F |
| 0.4969387089949282 | 0.6232825209054056 | 0.2778387132683269 | T | T | T |
| 0.2501599610000014 | 0.7498199839999984 | 0.0462899999999991 | F | F | F |
| 0.4167299539999973 | 0.5832700030000026 | 0.2062699860000023 | F | F | F |
| 0.3728499560000031 | 0.7452099819999987 | 0.0387400030000009 | F | F | F |
| 0.2886700009999998 | 0.5771600140000004 | 0.2022899959999975 | F | F | F |
| 0.3729199790000024 | 0.6270700019999964 | 0.0387100040000021 | F | F | F |
| 0.2887299779999992 | 0.7112699629999994 | 0.2023200000000003 | F | F | F |
| 0.3335199590000002 | 0.6664699720000016 | 0.1144300050000027 | F | F | F |
| 0.5001362867284360 | 0.4998575903760296 | 0.2753993540819442 | T | T | T |
| 0.7114600080000031 | 0.5385299900000007 | 0.1190500060000019 | F | F | F |
| 0.6263953265387863 | 0.6235788934613182 | 0.2776057654604440 | T | T | T |
| 0.5047899890000025 | 0.6271500049999972 | 0.0387400030000009 | F | F | F |
| 0.6728399770000024 | 0.7113299889999993 | 0.2022899959999975 | F | F | F |
| 0.7115099920000034 | 0.6724699680000015 | 0.1191200009999989 | F | F | F |
| 0.6265862679935147 | 0.5029980084859464 | 0.2779852166223818 | T | T | T |
| 0.5775099979999965 | 0.5384799750000013 | 0.1191200009999989 | F | F | F |
| 0.7469558429792083 | 0.6232047538681923 | 0.2786074232153025 | T | T | T |
| 0.5001699450000032 | 0.7498199839999984 | 0.0462899999999991 | F | F | F |
| 0.6667299539999973 | 0.5832700030000026 | 0.2062699860000023 | F | F | F |
| 0.6228499770000013 | 0.7452099819999987 | 0.0387400030000009 | F | F | F |
| 0.5386700009999998 | 0.5771600140000004 | 0.2022899959999975 | F | F | F |
| 0.6229199570000006 | 0.6270700019999964 | 0.0387100040000021 | F | F | F |
| 0.5387299989999974 | 0.7112699629999994 | 0.2023200000000003 | F | F | F |
| 0.5835199799999984 | 0.6664699720000016 | 0.1144300050000027 | F | F | F |
| 0.7499914817813838 | 0.4999165392143237 | 0.2755145989568361 | T | T | T |
| 0.9614600290000013 | 0.5385299900000007 | 0.1190500060000019 | F | F | F |
| 0.8764780547556791 | 0.6233953818126853 | 0.2783991397157460 | T | T | T |
| 0.7547899679999972 | 0.6271500049999972 | 0.0387400030000009 | F | F | F |
| 0.9228399559999971 | 0.7113299889999993 | 0.2022899959999975 | F | F | F |
| 0.9615100139999981 | 0.6724699680000015 | 0.1191200009999989 | F | F | F |
| 0.8766154962112899 | 0.5030031896035168 | 0.2784147468798520 | T | T | T |
| 0.8275100190000018 | 0.5384799750000013 | 0.1191200009999989 | F | F | F |
| 0.9970444688672917 | 0.6234042218161057 | 0.2784107655813011 | T | T | T |
| 0.7501699239999979 | 0.7498199839999984 | 0.0462899999999991 | F | F | F |
| 0.9167299750000026 | 0.5832700030000026 | 0.2062699860000023 | F | F | F |
| 0.8728499979999995 | 0.7452099819999987 | 0.0387400030000009 | F | F | F |
| 0.7886700219999980 | 0.5771600140000004 | 0.2022899959999975 | F | F | F |
| 0.8729200000000006 | 0.6270700019999964 | 0.0387100040000021 | F | F | F |
| 0.7887299779999992 | 0.7112699629999994 | 0.2023200000000003 | F | F | F |
| 0.8335200009999966 | 0.6664699720000016 | 0.1144300050000027 | F | F | F |
| 0.0000804424254652 | 0.4999115704580033 | 0.2753296956685329 | T | T | T |
| 0.2114599590000026 | 0.7885299619999984 | 0.1190500060000019 | F | F | F |
| 0.1266025856856094 | 0.8734046639515570 | 0.2783804654329939 | T | T | T |

|                     |                    |                     |   |   |   |
|---------------------|--------------------|---------------------|---|---|---|
| 0.00479000600000003 | 0.8771500269999990 | 0.03874000300000009 | F | F | F |
| 0.17283999400000003 | 0.9613300110000012 | 0.2022899959999975  | F | F | F |
| 0.21150998600000029 | 0.9224699410000028 | 0.1191200009999989  | F | F | F |
| 0.1265983512581740  | 0.7529380688842556 | 0.2784140222511021  | T | T | T |
| 0.0775099829999988  | 0.7884699840000025 | 0.1191200009999989  | F | F | F |
| 0.2470329992021240  | 0.8733915416570042 | 0.2784046995018225  | T | T | T |
| 0.00016993900000027 | 0.9998199560000032 | 0.0462899999999991  | F | F | F |
| 0.16672994700000003 | 0.8332699750000003 | 0.2062699860000023  | F | F | F |
| 0.1228499699999972  | 0.9952099540000034 | 0.03874000300000009 | F | F | F |
| 0.0386700179999977  | 0.8271600349999986 | 0.2022899959999975  | F | F | F |
| 0.12291997500000021 | 0.8770700239999982 | 0.03871000400000021 | F | F | F |
| 0.0387299499999969  | 0.9612699349999971 | 0.20232000000000003 | F | F | F |
| 0.08351999700000033 | 0.9164699929999998 | 0.11443000500000027 | F | F | F |
| 0.2500812949514900  | 0.7499156408597203 | 0.2753142807522539  | T | T | T |
| 0.46145998000000008 | 0.7885299619999984 | 0.11905000600000019 | F | F | F |
| 0.3766090120472632  | 0.8733798561568761 | 0.2783834447072922  | T | T | T |
| 0.2547900269999985  | 0.8771500269999990 | 0.03874000300000009 | F | F | F |
| 0.42283997300000021 | 0.9613300110000012 | 0.2022899959999975  | F | F | F |
| 0.46151000700000011 | 0.9224699410000028 | 0.1191200009999989  | F | F | F |
| 0.3765240458159545  | 0.7528610223663812 | 0.2784259842376225  | T | T | T |
| 0.3275099949999998  | 0.7884799970000032 | 0.1191200009999989  | F | F | F |
| 0.4969913895303260  | 0.8733714446739171 | 0.2784016945276654  | T | T | T |
| 0.2501599539999972  | 0.9998199560000032 | 0.0462899999999991  | F | F | F |
| 0.41672992600000021 | 0.8332699750000003 | 0.2062699860000023  | F | F | F |
| 0.3728499489999990  | 0.9952099540000034 | 0.03874000300000009 | F | F | F |
| 0.2886700179999977  | 0.8271600349999986 | 0.2022899959999975  | F | F | F |
| 0.37291997500000021 | 0.8770700239999982 | 0.03871000400000021 | F | F | F |
| 0.28872997100000022 | 0.9612699349999971 | 0.20232000000000003 | F | F | F |
| 0.3335199759999981  | 0.9164699929999998 | 0.11443000500000027 | F | F | F |
| 0.5001249429514892  | 0.7499484210090512 | 0.2752229761662270  | T | T | T |
| 0.71145995900000026 | 0.7885299619999984 | 0.11905000600000019 | F | F | F |
| 0.6266270110925914  | 0.8734255395159577 | 0.2783727788554402  | T | T | T |
| 0.50479000600000003 | 0.8771500269999990 | 0.03874000300000009 | F | F | F |
| 0.67283999400000003 | 0.9613300110000012 | 0.2022899959999975  | F | F | F |
| 0.71150998600000029 | 0.9224699410000028 | 0.1191200009999989  | F | F | F |
| 0.6265806055082211  | 0.7527518322447103 | 0.2783033856100932  | T | T | T |
| 0.5775100159999980  | 0.7884799970000032 | 0.1191200009999989  | F | F | F |
| 0.7470252248299156  | 0.8733794443869813 | 0.2784127210817821  | T | T | T |
| 0.50016993900000027 | 0.9998199560000032 | 0.0462899999999991  | F | F | F |
| 0.66672994700000003 | 0.8332699750000003 | 0.2062699860000023  | F | F | F |
| 0.6228499699999972  | 0.9952099540000034 | 0.03874000300000009 | F | F | F |
| 0.5386700179999977  | 0.8271600349999986 | 0.2022899959999975  | F | F | F |
| 0.6229199539999968  | 0.8770700239999982 | 0.03871000400000021 | F | F | F |
| 0.53872999200000004 | 0.9612699349999971 | 0.20232000000000003 | F | F | F |

|                    |                    |                    |   |   |   |
|--------------------|--------------------|--------------------|---|---|---|
| 0.5835199970000033 | 0.9164699929999998 | 0.1144300050000027 | F | F | F |
| 0.7500736394844746 | 0.7499152554712818 | 0.2752736385606200 | T | T | T |
| 0.9614599800000008 | 0.7885299619999984 | 0.1190500060000019 | F | F | F |
| 0.8766097543175538 | 0.8734256192977081 | 0.2783772785534104 | T | T | T |
| 0.7547899850000022 | 0.8771500269999990 | 0.0387400030000009 | F | F | F |
| 0.9228399730000021 | 0.9613300110000012 | 0.2022899959999975 | F | F | F |
| 0.9615100070000011 | 0.9224699410000028 | 0.1191200009999989 | F | F | F |
| 0.8767007374313875 | 0.7531138909889289 | 0.2784188956644500 | T | T | T |
| 0.8275100370000033 | 0.7884799970000032 | 0.1191200009999989 | F | F | F |
| 0.9970367377646764 | 0.8733969796601188 | 0.2784014314699316 | T | T | T |
| 0.7501699170000009 | 0.9998199560000032 | 0.0462899999999991 | F | F | F |
| 0.9167299260000021 | 0.8332699750000003 | 0.2062699860000023 | F | F | F |
| 0.8728499910000025 | 0.9952099540000034 | 0.0387400030000009 | F | F | F |
| 0.7886700390000030 | 0.8271600349999986 | 0.2022899959999975 | F | F | F |
| 0.8729199750000021 | 0.8770700239999982 | 0.0387100040000021 | F | F | F |
| 0.7887299710000022 | 0.9612699349999971 | 0.2023200000000003 | F | F | F |
| 0.8335200180000015 | 0.9164699929999998 | 0.1144300050000027 | F | F | F |
| 0.0000843823909149 | 0.7499054041235967 | 0.2753293973135386 | T | T | T |
| 0.4588600683813930 | 0.4461099175382134 | 0.3773146494560885 | T | T | T |
| 0.4092460351154487 | 0.5113070867813601 | 0.3872980478243437 | T | T | T |
| 0.5147780228820462 | 0.6220018591791010 | 0.3883666673800796 | T | T | T |
| 0.6185748447569209 | 0.6142828423318301 | 0.3848561088496122 | T | T | T |
| 0.6192497377805483 | 0.5116334426858343 | 0.3840961374283062 | T | T | T |
| 0.5113849074957165 | 0.5130282458981806 | 0.3799604807952531 | T | T | T |
| 0.4794645553516670 | 0.5529957290149590 | 0.3854936672195507 | T | T | T |
| 0.5833996234777168 | 0.5456665016401179 | 0.3820535011994063 | T | T | T |
| 0.3992126349788703 | 0.4487398854618879 | 0.3813863433536794 | T | T | T |
| 0.5828932820911226 | 0.6479566513186362 | 0.3862951581461043 | T | T | T |
| 0.4615146786695763 | 0.4058831800303919 | 0.3633101315883724 | T | T | T |
| 0.3496629339547486 | 0.4018641539851592 | 0.3834280893597338 | T | T | T |
| 0.6143954033102015 | 0.7038900157395351 | 0.3885409289127596 | T | T | T |
| 0.6691761626149961 | 0.5391955436725951 | 0.3740021695842081 | T | T | T |
| 0.5949932114823048 | 0.4611073876582398 | 0.3752451725331402 | T | T | T |

**Data S3.** CONTCAR of adenine adsorbed on C-111.
